# Supplementary material
Source: publisher figshare collection journal article supplement (https://gsajournals.figshare.com/articles/dataset/_/6741575)
Supplement: Supplementary file 1 [file 1]

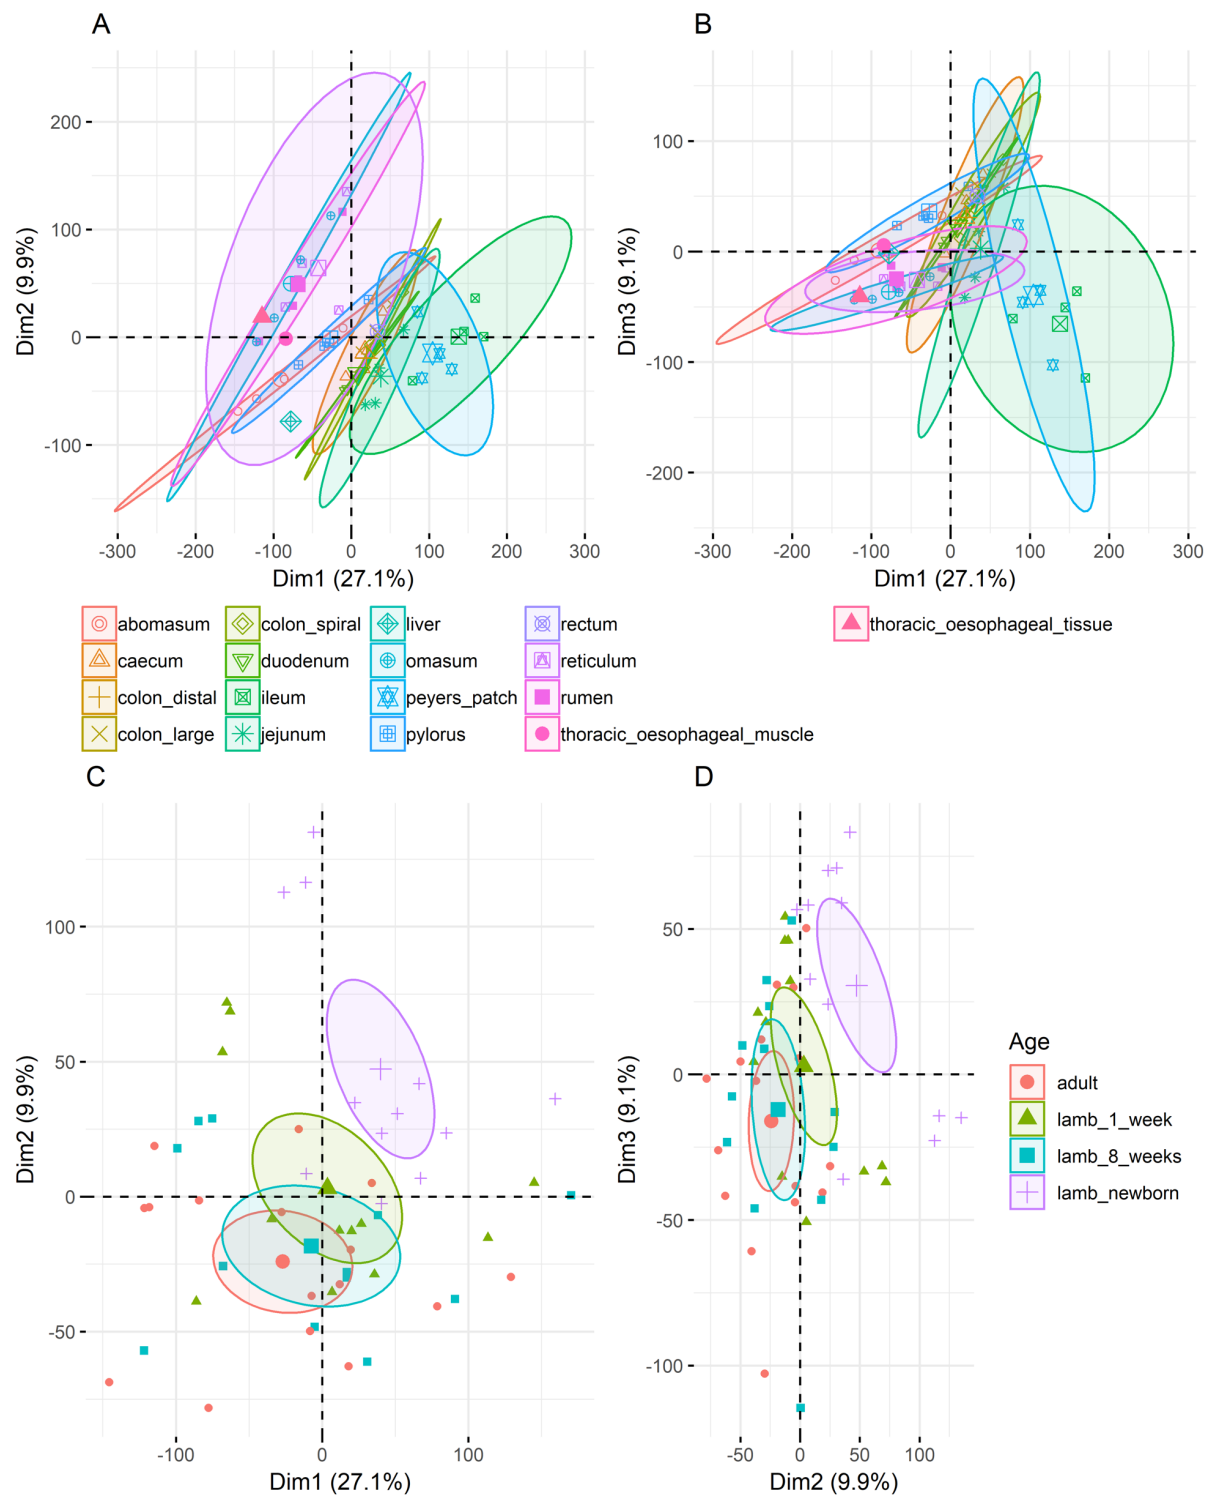

**Figure S1: Principal Component Analysis of sheep GI tract samples illustrating separation by tissue (A & B) and developmental stage (C & D) in three components. The mean of each group was used as the centre of the circle coloured-by-group with a confidence interval of 0.95 as the ellipse size.**
