# Supplementary material
Source: publisher figshare collection journal article supplement (https://gsajournals.figshare.com/articles/dataset/_/6741575)
Supplement: Supplementary file 1 [file 1]

## Sheet: Sheet1
Table S5: Differentially expressed genes in the sheep rumen using pairwise comparisons between birth and one week and one week and 8 weeks of age.
A: DE genes between birth and one week of age							B: DE genes between one week and 8 weeks of age
GENE_NAME	LOG_FC	P	FDR	AVG_COUNT_NEWBORN	AVG_COUNT_1WEEK		GENE_NAME	LOG_FC	P	FDR	AVG_COUNT_1WEEK	AVG_COUNT_8WEEK
ENSOARG00000010221	5.21582	2.19e-92	2.97e-88	368.971	11497.7		UPK3B	-5.07605	1.24e-58	1.68e-54	1160.67	25
JAK3	5.45576	2.06e-83	1.86e-79	114.667	4311.33		ACSM3	-6.03795	1.47e-45	6.64e-42	1933.67	20.6667
KLK12	5.83853	3.95e-83	2.67e-79	62.8694	3073.15		VILL	-5.00975	3.54e-44	1.2e-40	2323.33	52
CA12	6.2706	3.78e-65	2.04e-61	19.6667	1309		NXPE4	-3.99185	7.01e-43	1.9e-39	3936.02	177.58
ENSOARG00000009277	6.18874	3.09e-60	1.39e-56	27.0627	1725.82		KRT13	-4.27611	6.07e-36	1.17e-32	455275	17082.1
SULT1C2	4.04248	2.48e-56	9.6e-53	33.3333	456.333		CSTA	-4.14675	1.04e-33	1.88e-30	2303	93.6667
AQP5	7.76651	3.11e-52	1.05e-48	70	12828.3		ENSOARG00000004854	-5.24414	3.24e-33	5.47e-30	2556.67	48.4213
HMGCS2	8.38715	2.34e-50	7.03e-47	65.6667	19467		MYCL	-4.42486	4.54e-33	7.22e-30	385	12.6667
STARD5	2.93959	1.92e-47	5.2e-44	146.667	948.333		ADGRF1	-4.17527	7.41e-32	1.11e-28	713.475	28.4501
ENSOARG00000006727	4.71048	2.58e-47	6.33e-44	924.318	20554.4		ENSOARG00000026285	-3.52244	2.02e-28	2.37e-25	667.146	41.2718
SMPD3	4.54298	8.15e-47	1.84e-43	171.667	3325.67		TSPAN2	4.00594	2.28e-28	2.57e-25	26.3333	301.667
SIRT6	2.8152	1.05e-46	2.18e-43	120.667	713.333		ACSS1	3.32703	3.5e-28	3.78e-25	144.667	1046
ANKRD24	4.38655	3.25e-46	6.27e-43	36.6667	662.333		KRT7	-5.44987	7.42e-28	7.72e-25	1054.7	17.3352
ENSOARG00000009762	4.5931	3.62e-46	6.53e-43	185.662	3901.03		ADGRG7	-3.79693	3.31e-27	3.2e-24	810	41.6667
ENSOARG00000001059	2.5923	2.52e-45	4.26e-42	1069.68	5294.73		DLK2	-4.21506	1.09e-26	9.8e-24	514	20
PPIF	2.98369	2.91e-45	4.63e-42	569	3685		ISM1	-3.76707	2.69e-26	2.34e-23	399	21.3333
ADGRV1	3.25117	1.25e-44	1.88e-41	218.667	1828.67		DAB1	4.11148	7.45e-26	5.76e-23	24.6667	311.333
ENSOARG00000009708	5.0724	5.08e-43	7.24e-40	83.9853	2413.78		ACE2	-5.06147	7.49e-25	5.2e-22	634.333	13.6667
KLK13	5.77669	9.19e-42	1.24e-38	118.333	5323.33		ENSOARG00000025481	4.84995	2.4e-23	1.47e-20	106.92	1249.37
ENSOARG00000010661	4.69479	5.26e-41	6.78e-38	38.8423	855.239		C9orf152	-3.5253	2.44e-23	1.47e-20	296	18.3333
ENSOARG00000002666	3.15547	1.17e-40	1.44e-37	67.0267	515.982		DNAJB5	4.66267	4.7e-23	2.71e-20	102.333	1875.33
ENSOARG00000026990	5.61856	9.68e-40	1.14e-36	215.667	8857.33		C5	-4.18826	8.52e-23	4.61e-20	404.333	15.6667
PLA2G4F	2.92611	1.07e-39	1.2e-36	168.333	1096.33		SMPD3	-6.25092	1.22e-22	6.46e-20	3325.67	32
ENSOARG00000000313	2.72381	7.6e-38	7.62e-35	601.667	3196.67		CLMP	4.13443	1.43e-22	7.29e-20	82.6667	1048.33
WFDC2	-4.97623	7.9e-38	7.63e-35	866.667	18.6667		RBPMS2	5.62789	1.67e-22	8.36e-20	67.3333	2326
SLC9A3	5.96092	1.16e-36	1.05e-33	149.667	8097		TMEM164	-2.50161	3.15e-22	1.52e-19	3998.28	511.175
ENSOARG00000002958	3.67809	4.28e-36	3.73e-33	67.7602	644.747		JAK3	-2.81049	3.94e-22	1.84e-19	4311.33	446.667
FABP4	7.32295	4.59e-36	3.88e-33	28	3615.67		DNAI1	3.16937	8.75e-22	4.01e-19	73.5908	472.611
ENSOARG00000025169	2.43011	8.68e-36	7.12e-33	472.143	2142.33		C2orf54	-4.01117	9.84e-22	4.44e-19	5952.01	271.618
IL36RN	4.63114	9.32e-36	7.42e-33	53.3333	1128		PRKCB	5.4298	1.49e-21	6.61e-19	31.6667	999.667
SELENBP1	3.05858	9.97e-36	7.71e-33	1833	12754.3		ENSOARG00000002230	-2.84158	1.6e-21	6.97e-19	796.839	80.6819
UNC93A	4.2714	2.3e-35	1.73e-32	13.6667	224.667		BBOX1	-3.39821	2.41e-21	1.03e-18	595	40.3333
ENSOARG00000025170	3.43193	5.42e-35	3.97e-32	141.727	1325.16		COL24A1	-3.16502	2.75e-21	1.14e-18	332.333	26.6667
LYPD5	3.83019	6.57e-35	4.67e-32	21	251.333		ENSOARG00000004641	5.14624	6.39e-21	2.58e-18	61.3333	1603
NOD1	2.51157	3.44e-34	2.39e-31	256.667	1241.33		AASS	3.74987	7.48e-21	2.93e-18	56.3333	544.667
KRT35	5.82458	1.41e-33	9.51e-31	16.0989	776.146		PTPRZ1	-3.01021	1.76e-20	6.82e-18	2364.33	211.667
ENSOARG00000011490	4.92673	1.32e-32	8.71e-30	39.7389	1012.13		RHOQ	2.83787	2.17e-20	8.28e-18	48.6667	244.667
GPT	2.24528	1.79e-32	1.15e-29	172.333	690.333		ACTN2	5.69879	2.26e-20	8.39e-18	61.6676	2242.06
INSIG1	3.06421	3.27e-32	2.06e-29	112.333	792.667		CLDN23	-3.56642	2.26e-20	8.39e-18	444.333	27.3333
ENSOARG00000010485	2.6723	6.52e-32	4.01e-29	1019	5569.33		CFL2	4.68665	3.3e-20	1.21e-17	294.812	5236.93
PLA2G4E	4.81236	1e-31	6.04e-29	119.667	2850		LDB3	5.67367	4.26e-20	1.52e-17	46.3333	1681
HIF3A	-4.43805	1.16e-31	6.83e-29	4785	187.666		CPXM1	-3.11256	5.68e-20	1.99e-17	2281	189.667
VSIG10	2.23859	1.28e-31	7.36e-29	289	1150.67		ENSOARG00000025916	-3.86798	5.72e-20	1.99e-17	247.886	12.2621
OTUB2	2.7137	1.93e-31	1.09e-28	215.333	1184.33		ENSOARG00000026869	-7.77803	6.95e-20	2.35e-17	3878.33	13
ENSOARG00000000480	2.8409	2.21e-31	1.22e-28	202.667	1244		VSIG2	-3.29152	2.49e-19	8.11e-17	323.815	24.0709
CYP2S1	2.81062	4.4e-31	2.38e-28	346.667	2007.33		B4GALNT2	-3.59049	4.56e-19	1.47e-16	1867.33	110.667
LIPN	5.08973	4.83e-30	2.51e-27	53.7144	1638.04		ENSOARG00000014614	4.12032	6.29e-19	2e-16	111.566	1427.28
IL22RA1	3.71574	8.53e-30	4.35e-27	44.3333	487.333		ENSOARG00000014138	-5.49399	8.18e-19	2.57e-16	2484.67	40.3333
ENSOARG00000002151	2.57271	4.05e-29	2.03e-26	371.333	1934.33		KRT4	-9.73944	8.86e-19	2.76e-16	514576	441
RUNX2	-3.13885	7.28e-29	3.51e-26	888	85.6667		ENSOARG00000011081	-4.06633	1.39e-18	4.23e-16	3553.67	155.333
ENSOARG00000003902	2.52747	7.88e-29	3.74e-26	1045.49	4476.87		PON3	-3.30951	2.17e-18	6.46e-16	851.794	61.8074
ENSOARG00000000738	2.47519	9.5e-29	4.43e-26	552	2611.33		LIMS2	5.0086	2.91e-18	8.57e-16	194.667	4475
ENTPD5	2.97245	1.27e-28	5.83e-26	397.667	2650.33		JMY	2.36504	4.2e-18	1.21e-15	102.333	381.667
MCCD1	3.37193	1.77e-28	8e-26	21	158.333		SLC2A4	4.48498	5.22e-18	1.49e-15	35.3333	568
THEM5	2.02092	1.73e-27	7.57e-25	210.974	744.881		PCP4L1	4.68978	6.83e-18	1.93e-15	23	437
ENSOARG00000008501	6.27295	2.24e-27	9.62e-25	19	1109.66		ENSOARG00000012178	3.91906	6.95e-18	1.94e-15	15.3333	163.667
SAMD8	3.17927	2.82e-27	1.19e-24	99.3333	778.333		2006-09-01	3.46729	1.1e-17	3.01e-15	120.667	971
B3GNT3	2.86322	3.1e-27	1.29e-24	570.55	3590.26		ENSOARG00000002867	3.85846	1.2e-17	3.24e-15	127.667	1356
ENSOARG00000002396	3.32162	7.07e-27	2.85e-24	33.9143	283.858		FLNC	5.81144	1.31e-17	3.5e-15	633.667	25848.4
SLURP1	3.09699	1.55e-26	6.18e-24	51.6667	375.667		FLNA	4.91072	1.42e-17	3.77e-15	11599.9	251441
ENSOARG00000016186	3.15886	4.53e-25	1.75e-22	308	2300.33		GPX3	4.89207	1.48e-17	3.89e-15	35.6667	757
GJB2	2.56057	6.4e-25	2.44e-22	4367.67	21242.3		KLK5	-3.28946	1.57e-17	4.07e-15	859.673	64.6586
ENSOARG00000008702	2.13151	1.7e-24	6.4e-22	323.971	1211.13		NCS1	3.83567	1.88e-17	4.81e-15	55.6667	584.667
ACADS	2.62673	3.44e-24	1.26e-21	498	2578.1		ENSOARG00000009990	6.40966	1.95e-17	4.93e-15	399.333	23800.3
SLC9A2	3.32254	6.75e-24	2.44e-21	150.667	1319.33		TACR2	5.56543	2.25e-17	5.58e-15	15.6832	521.881
ENSOARG00000025555	7.79898	1.84e-23	6.28e-21	44.1881	8535.75		CRYAB	5.15153	2.24e-17	5.58e-15	50	1270.33
ENSOARG00000008946	5.31828	3.45e-23	1.17e-20	24.6667	890		ENSOARG00000007615	-2.96597	3.32e-17	8.01e-15	3697.52	340.492
ATP6V1C2	4.04623	4.63e-23	1.54e-20	207	2915.33		ENSOARG00000017883	4.41712	3.35e-17	8.03e-15	30.3333	486.333
CA1	4.24934	5.69e-23	1.88e-20	3945.59	63912.8		CSRP1	4.89824	3.6e-17	8.39e-15	831.351	17615.5
ENSOARG00000004617	2.30372	1.02e-22	3.34e-20	247.333	1024		DES	7.67535	4.22e-17	9.76e-15	2297.67	321531
GSTP1	2.36395	1.81e-22	5.76e-20	4351.31	18395.3		FAM46B	2.96428	5.57e-17	1.28e-14	167.333	987
PLA2G2F	5.80454	2.31e-22	7.26e-20	18.6667	912.667		EDN3	-2.95855	5.98e-17	1.36e-14	178	16.3333
CEP72	2.90346	3.28e-22	1.02e-19	257	1631.67		SYNPO2	5.46812	6.43e-17	1.45e-14	506.667	15730.3
ENSOARG00000000835	3.43095	7.27e-22	2.24e-19	548	4304.33		ENSOARG00000017789	4.36176	6.55e-17	1.46e-14	30.3333	458.667
ENDOU	3.95952	1.1e-21	3.22e-19	1000	13243.3		ENSOARG00000008022	6.81974	9.75e-17	2.14e-14	132	10250.7
TMEM229B	3.20834	1.15e-21	3.33e-19	664	4676.33		ENSOARG00000000119	5.24108	1.14e-16	2.47e-14	165	4527.67
ENSOARG00000009642	3.78905	1.42e-21	4.09e-19	53.2198	654.181		CALD1	4.48584	1.41e-16	3.02e-14	3117.67	49470.4
ENSOARG00000018268	3.46614	2.95e-21	8.22e-19	1177.61	11201.1		TNS1	4.03692	1.44e-16	3.05e-14	1308.1	15603.2
ENSOARG00000006272	3.95317	4.45e-21	1.23e-18	33	435		TRPA1	-2.65763	1.43e-16	3.05e-14	672.705	76.2069
PLA2G3	3.46034	7.24e-21	1.98e-18	41.3333	389.667		ENAH	3.4178	1.61e-16	3.32e-14	1027	7850.67
ENSOARG00000002447	3.66091	1.63e-20	4.42e-18	37.9249	399.504		ENSOARG00000015847	6.34875	2.89e-16	5.79e-14	1133.42	63509
UGT1A1	2.44395	1.88e-19	4.8e-17	2141.38	9364.45		SCEL	-4.74573	3.37e-16	6.65e-14	5906.33	159
KLK14	7.5058	2.77e-19	6.94e-17	10.3333	1567.33		COL8A1	3.66617	3.44e-16	6.74e-14	220	1974.67
PHYHIP	2.98595	2.9e-19	7.21e-17	32	214.667		NUPR1	2.7331	3.47e-16	6.76e-14	84.6667	406
ENSOARG00000005829	2.021	3.08e-19	7.58e-17	235.065	753.895		SLC37A1	-3.15442	3.57e-16	6.9e-14	906.667	74
OVAR-DRB3	3.33993	4.04e-19	9.75e-17	26.6667	222.53		F3	-3.73304	3.92e-16	7.53e-14	2440.33	135.333
AHCYL2	2.35272	5.39e-19	1.28e-16	1090.33	4793.67		EPB41L3	2.93522	4.65e-16	8.8e-14	126.333	696
ENSOARG00000018232	3.39182	1.12e-18	2.57e-16	348.723	3164.9		TAGLN	6.10688	4.92e-16	9.17e-14	1678.34	79695.7
AOX1	2.27899	1.12e-18	2.57e-16	1324.33	5572.33		MGAT3	-3.98404	7.72e-16	1.43e-13	286	13.3333
DUSP4	2.98193	1.33e-18	3.03e-16	16	107		PLN	3.27701	7.97e-16	1.47e-13	77	552.333
BDH1	2.07915	2.18e-18	4.89e-16	2169.67	7847		ENSOARG00000014819	-6.2011	8.89e-16	1.62e-13	1760.94	16.9029
SPOCK1	-3.0124	2.23e-18	4.96e-16	2145.33	232		SLC23A1	-2.93647	9.66e-16	1.74e-13	1112.67	105.667
UGT2B7	2.45607	3.43e-18	7.36e-16	201.333	968.333		ITGA7	3.91576	1.02e-15	1.83e-13	542.333	5866
MFGE8	3.55823	4.43e-18	9.36e-16	429.667	4360.33		CASQ1	5.23197	1.06e-15	1.88e-13	13.3333	361.333
EDN1	2.94261	4.76e-18	9.97e-16	23.3333	149.667		ACTN1	4.18809	1.16e-15	2.05e-13	1555.67	20597.3
A2M	3.29179	8.73e-18	1.74e-15	14318.3	124553		ENSOARG00000027005	-2.6855	1.24e-15	2.17e-13	295.538	32.5172
ENSOARG00000017584	3.03501	1.15e-17	2.25e-15	554.997	3840.9		PCSK7	4.66786	1.57e-15	2.74e-13	1942.33	35663.1
TGM3	4.15007	2.72e-17	5.21e-15	2831.67	43468.7		CACNA1I	3.66987	1.59e-15	2.76e-13	56.6667	536.667
MFSD2A	3.43015	4.7e-17	8.76e-15	28	249.333		ENSOARG00000015352	5.62774	1.71e-15	2.89e-13	19.6667	645.667
KSR1	2.19434	4.98e-17	9.24e-15	288.674	1112.5		GNG11	2.50694	1.71e-15	2.89e-13	410.667	1673
MEG3_2	-2.69144	5.05e-17	9.25e-15	1295.67	167.333		ENSOARG00000007758	3.6376	1.75e-15	2.95e-13	30	271.333
ENSOARG00000010303	2.22008	7.88e-17	1.4e-14	277.667	822.667		RCAN2	3.23544	1.95e-15	3.26e-13	31.6667	213.667
TREX2	3.40208	1.33e-16	2.36e-14	106.333	906		HSPB6	5.66299	2.05e-15	3.4e-13	93	3306.67
FPGS	2.24743	1.88e-16	3.22e-14	126.229	510.608		NEXN	4.6243	2.16e-15	3.56e-13	130.667	2207.67
ENSOARG00000001005	2.17215	2.49e-16	4.23e-14	41	138		DTNA	4.29777	2.32e-15	3.81e-13	50.6667	700
ALOX12B	3.76987	3.1e-16	5.17e-14	35	407.667		ADCY7	-2.10124	2.52e-15	4.1e-13	916.667	156.667
CLDN4	2.20014	3.1e-16	5.17e-14	825.255	2945.8		ENSOARG00000020195	4.6216	3.13e-15	5.01e-13	50.6667	915.333
ADM	2.66842	5.7e-16	9.4e-14	92.3333	490.333		ENSOARG00000025484	6.06089	3.28e-15	5.19e-13	10.4302	496.395
SOAT1	3.26535	7.84e-16	1.28e-13	97.6667	802.667		PITX2	4.05434	3.27e-15	5.19e-13	14	173.333
RAB19	2.44649	8.6e-16	1.39e-13	99.6667	455.667		ENSOARG00000018728	3.99495	3.31e-15	5.21e-13	275.333	3208.35
SLC14A1	2.40402	9.27e-16	1.49e-13	2180.67	10158		CNN1	7.13356	3.86e-15	6.03e-13	931.333	90149.7
SLC1A4	2.28295	1.2e-15	1.84e-13	60.3333	244		SLC9B2	3.68372	3.91e-15	6.08e-13	12.6667	117.333
FAM43A	2.15211	1.21e-15	1.84e-13	149.667	564		KIF21A	-2.1195	4.03e-15	6.23e-13	3093	508
LYPD6	2.10889	1.48e-15	2.25e-13	610.649	2330.35		RRAS	4.03281	4.25e-15	6.53e-13	185.333	2187.33
SLC12A7	2.13057	1.5e-15	2.26e-13	189.531	700.454		ENSOARG00000011683	-2.10051	4.35e-15	6.65e-13	349	59.6667
TGM5	3.7992	1.62e-15	2.41e-13	29	337		ENSOARG00000026696	-3.37449	5.04e-15	7.62e-13	544.613	38.9175
NQO1	3.19101	2.87e-15	4.22e-13	62.6667	468		ENSOARG00000010655	3.73149	5.27e-15	7.91e-13	66.6667	655
ENSOARG00000000416	2.32193	9.06e-15	1.26e-12	46.3257	186.165		ENSOARG00000007679	3.84216	5.47e-15	8.18e-13	48.3334	504.667
ATP6V0A4	2.81399	1.17e-14	1.6e-12	116.333	714.333		ENSOARG00000014639	3.78789	6.2e-15	9.07e-13	55	558.667
ENSOARG00000020166	3.25203	1.38e-14	1.88e-12	51.6667	391.667		GGT5	2.05623	6.18e-15	9.07e-13	156	468.333
GLYCTK	2.48848	2.3e-14	3.09e-12	70.6667	339.333		BARX2	-2.42824	6.4e-15	9.26e-13	1038.69	138.281
PRSS27	3.22156	3.13e-14	4.13e-12	1419.33	10756		REEP6	-2.43988	6.38e-15	9.26e-13	345.333	45.6667
FOXN1	2.65601	6.04e-14	7.74e-12	29.6667	157.333		HSF4	3.67782	7.16e-15	1.03e-12	26	243.667
ENSOARG00000000351	5.9816	6.55e-14	8.35e-12	321.99	18862.5		CALML4	2.82214	8.31e-15	1.19e-12	158	790.333
SPTSSB	3.20028	8.28e-14	1.05e-11	109.333	753		SMTN	3.9055	8.6e-15	1.22e-12	1666.05	18078.3
ENSOARG00000026554	2.92929	8.59e-14	1.08e-11	226.428	1480.01		ENSOARG00000020202	4.47442	8.83e-15	1.25e-12	42.3458	675.696
ENSOARG00000013832	2.72954	1.09e-13	1.34e-11	67.2398	380.586		IL17RE	-2.24951	9.24e-15	1.3e-12	208.667	31.6667
FCER2	-3.73168	1.38e-13	1.68e-11	248	15.3333		PIK3IP1	3.07383	9.49e-15	1.33e-12	25.6667	160
ENSOARG00000000377	-4.63523	1.56e-13	1.9e-11	1548.67	43		COL7A1	-2.21273	1.03e-14	1.44e-12	9449.33	1475.33
NOXO1	2.49545	1.67e-13	2.03e-11	244.333	1161.33		MYOC	5.43654	1.12e-14	1.55e-12	16.6667	515
KLK10	4.75002	2.53e-13	2.99e-11	138	2962		RFX2	2.19139	1.17e-14	1.61e-12	77	253.667
DHRS9	2.85215	2.88e-13	3.33e-11	327.667	2020.67		MAP1A	4.6789	1.37e-14	1.88e-12	248.333	4527.67
TGM1	2.71333	3.27e-13	3.68e-11	3361	18886.7		DUSP27	4.11955	1.38e-14	1.89e-12	72.6667	913
ENSOARG00000016081	2.07361	3.28e-13	3.68e-11	1517.39	5256.67		CDO1	-2.30338	1.48e-14	2.01e-12	908.667	129.667
ENSOARG00000009097	5.30439	3.5e-13	3.92e-11	55	1833.79		CNTNAP1	4.18372	1.73e-14	2.33e-12	306.333	3985.67
GPX2	3.52113	4.36e-13	4.78e-11	387.333	3510		KCNMA1	5.51893	1.84e-14	2.48e-12	87	2742
ENSOARG00000012364	-2.61331	4.78e-13	5.2e-11	323.333	46.3333		PDLIM3	4.06316	1.86e-14	2.5e-12	591.333	6934
ART3	-2.46574	4.82e-13	5.22e-11	88	13.6667		SYBU	3.89116	1.99e-14	2.66e-12	21	224.333
ENSOARG00000015390	3.85668	5.08e-13	5.48e-11	79	973.667		MRGPRF	4.33838	2.28e-14	3.03e-12	128.667	1888.33
ENSOARG00000026131	-2.26906	5.54e-13	5.95e-11	34213.7	5658.33		FADS3	3.94555	2.3e-14	3.03e-12	51.4164	577.472
CES2	2.74662	7.82e-13	8.2e-11	496	2877		ENSOARG00000026389	3.3707	2.74e-14	3.59e-12	198.667	1467.32
SLC26A9	4.31147	8.07e-13	8.42e-11	132	2237		DUSP26	4.0606	2.94e-14	3.84e-12	10.6667	130.333
CYP26A1	3.89884	1.13e-12	1.16e-10	22.3333	289		ENSOARG00000020199	4.25456	3.01e-14	3.91e-12	32.3208	446.971
SLC25A5	2.09144	1.16e-12	1.18e-10	1020.42	3673.04		TNFRSF19	-2.60466	3.29e-14	4.24e-12	162.667	19.3333
ENSOARG00000016811	3.45308	1.28e-12	1.29e-10	11.6667	102.333		ENSOARG00000006700	3.44764	3.76e-14	4.79e-12	153	1236.33
ENSOARG00000009499	2.19499	1.65e-12	1.62e-10	70	260.667		NECTIN3	3.60484	3.89e-14	4.94e-12	37	319.667
ENSOARG00000005759	2.04721	1.86e-12	1.81e-10	152.455	533.223		OTOP3	-3.99057	4.79e-14	6e-12	590	26.3333
ENSOARG00000017016	4.09333	1.95e-12	1.89e-10	276.383	4048.3		CTSV	-2.25659	4.94e-14	6.16e-12	9464	1422
ENSOARG00000010451	2.41165	2.12e-12	2.02e-10	1940.32	8962.46		LNX1	-2.09893	5.14e-14	6.37e-12	347.667	58.6667
ADRA2A	2.60339	2.17e-12	2.07e-10	13	66.3333		ENSOARG00000007262	3.54563	5.74e-14	7.02e-12	40.6667	347.667
ENSOARG00000025554	6.95841	2.78e-12	2.6e-10	155.847	17655.3		PPP1R12C	2.66977	5.86e-14	7.14e-12	431.591	2001.86
NOS2	4.12763	3.22e-12	2.97e-10	26.6667	403		MTCL1	2.75082	6.02e-14	7.3e-12	233.333	1132.67
ENSOARG00000006669	4.91486	3.56e-12	3.26e-10	10.1879	274.756		GMPR	4.27965	6.29e-14	7.6e-12	46	643.667
SAMD9	2.36376	4.01e-12	3.66e-10	661.667	2986.33		PIK3AP1	-3.09489	6.37e-14	7.67e-12	1176.33	101
PEG10	-2.32203	4.68e-12	4.25e-10	1028.33	176.333		ENPP5	3.15108	6.41e-14	7.68e-12	52.6667	326.667
CD74	2.94591	6.83e-12	6.12e-10	247.333	1530		ENSOARG00000026131	-2.31126	6.69e-14	7.97e-12	5658.33	835.333
SDF2L1	2.33068	1.18e-11	1.01e-09	62	271.333		TMPRSS4	-4.59311	7.1e-14	8.42e-12	3957.55	117.408
ENSOARG00000008128	2.63167	1.19e-11	1.02e-09	92	446.667		SH3RF2	-2.16474	7.16e-14	8.43e-12	1642	264.333
TTC39B	2.31474	1.37e-11	1.17e-09	44.6667	194		AKAP6	4.03089	7.59e-14	8.89e-12	26	306
PRND	2.62706	1.46e-11	1.24e-09	10.6667	54.3333		CCDC136	5.63431	7.87e-14	9.18e-12	12.6667	472
GCNT3	2.26419	1.61e-11	1.36e-09	1488.33	6081.33		ENSOARG00000005556	-2.07014	8.23e-14	9.56e-12	1949	320.667
KRT17	4.89109	1.64e-11	1.38e-09	401.386	10167		SLC16A9	-2.62865	8.95e-14	1.04e-11	192.333	22
OVOL1	2.52291	2.58e-11	2.1e-09	103.76	482.9		SLC25A23	3.17975	9.45e-14	1.08e-11	258.667	1731.67
ENSOARG00000020393	3.06386	3.39e-11	2.71e-09	25092.6	117930		KCNMB1	4.51074	1e-13	1.13e-11	107.667	1749.33
SULT2B1	2.21818	3.86e-11	3.04e-09	1168.33	4475.67		LRRC20	-3.26109	9.98e-14	1.13e-11	969	73.6666
S100A5	3.94978	6.23e-11	4.72e-09	34	383		PIK3CG	-2.14932	1.05e-13	1.18e-11	399	64.6667
PGC	2.71669	6.81e-11	5.13e-09	83.3333	465.667		COL8A2	2.92501	1.12e-13	1.26e-11	40	225
SYNGR3	2.17541	7.64e-11	5.63e-09	16.6667	60.3333		PYGM	5.28555	1.14e-13	1.27e-11	48.6667	1353.67
DOCK2	2.68436	8.54e-11	6.28e-09	31.6667	171.333		ME3	3.1215	1.17e-13	1.3e-11	32	202.667
H19_1	-3.65864	8.72e-11	6.4e-09	1848.67	173		TMOD1	2.89538	1.52e-13	1.67e-11	42.0394	228
ENSOARG00000013777	2.14548	8.86e-11	6.48e-09	344.323	1306.98		PYGB	2.11006	1.7e-13	1.85e-11	617	1925.33
ATP7B	-3.06724	9.23e-11	6.71e-09	335	34.3333		KCNJ15	-2.83208	1.85e-13	2e-11	139.333	14
ENSOARG00000017002	4.4723	9.92e-11	7.14e-09	1248.03	23705.5		TPM1	5.65652	2.3e-13	2.45e-11	2273	76608.7
TIGAR	2.0668	1.25e-10	8.76e-09	84.6667	302.333		MYLK	4.97472	2.37e-13	2.52e-11	2245.33	49642.7
TRPM6	2.1982	2.12e-10	1.43e-08	88.3333	361		PLEKHH1	-3.68166	2.48e-13	2.62e-11	430	24.3333
ENSOARG00000002283	4.53869	2.42e-10	1.6e-08	18.2886	344.81		ENSOARG00000025475	4.30198	2.66e-13	2.8e-11	381.333	5365
CYP4B1	5.83273	3.37e-10	2.18e-08	19.0002	929.68		ENSOARG00000002814	2.90098	3.03e-13	3.17e-11	59.6667	319.667
GLUL	2.00609	5.14e-10	3.22e-08	5691	19252.7		THBS4	4.52283	3.62e-13	3.77e-11	1047	17278.7
FAM3B	2.02493	5.6e-10	3.49e-08	152	490.333		OLFML2B	4.29089	3.87e-13	4e-11	131.333	1839.67
DMKN	4.25914	5.81e-10	3.61e-08	223.667	3728		BEX5	-3.02924	4.06e-13	4.17e-11	134.333	12.3333
FFAR4	2.01747	6.23e-10	3.85e-08	27	90.3333		ACTG2	6.62163	4.2e-13	4.31e-11	4226	280894
CA8	-2.10367	6.41e-10	3.95e-08	93.6667	18		TC2N	-2.4631	4.44e-13	4.52e-11	167	21.3333
ENSOARG00000018998	2.24441	8.38e-10	5.04e-08	46.7501	173.935		RTN4RL1	3.6748	4.76e-13	4.8e-11	16.6667	158.667
IRF7	2.74885	9e-10	5.35e-08	111	621.667		PLIN4	5.44243	5.03e-13	5.06e-11	91.6667	2765
G0S2	2.21845	9.36e-10	5.55e-08	32.6667	100.667		PHLDB2	3.32996	5.12e-13	5.13e-11	312.333	2275
PDE6A	2.65369	1.33e-09	7.61e-08	35.3333	194.333		TWIST2	-2.52543	5.48e-13	5.45e-11	153	19.6667
TMEM173	2.28959	1.35e-09	7.73e-08	153	622.333		RAI2	3.07676	5.55e-13	5.48e-11	41.3333	254.667
SULT1B1	2.49966	1.68e-09	9.32e-08	19.3333	96.3333		ADAMTSL2	4.48484	5.65e-13	5.54e-11	23.6667	387.667
SERPINB11	-2.74381	2.67e-09	1.43e-07	497.369	63.7094		MADCAM1	-2.80781	6e-13	5.85e-11	131.512	13.4271
P2RX7	2.38892	2.74e-09	1.46e-07	21.3333	94.6667		SERPINE1	-4.24852	6.33e-13	6.13e-11	440	17.6667
ENSOARG00000025959	-2.31579	2.95e-09	1.57e-07	100.524	17.2735		SMPX	7.0032	6.44e-13	6.22e-11	11.3333	978.333
PSMB9	3.1292	3.63e-09	1.88e-07	28.6667	202.667		PRUNE2	5.69592	6.57e-13	6.33e-11	88.3333	3151.33
LINC00675	2.79215	3.68e-09	1.89e-07	28.3333	138.333		FGF11	2.83533	6.68e-13	6.41e-11	53.6667	277.667
IGHM	4.09879	4.03e-09	2.04e-07	19.6667	289		ENSOARG00000002227	3.23283	7.08e-13	6.74e-11	73	494.667
NGFR	-2.26466	4.64e-09	2.31e-07	70.3333	12.3333		SYNE1	2.19717	7.06e-13	6.74e-11	632.667	2069
HLA-DRA	3.18117	5.15e-09	2.54e-07	194.333	1430.33		STBD1	3.07445	7.33e-13	6.96e-11	28.6667	178
ADAM28	-2.45559	6.78e-09	3.24e-07	118.333	18.6667		FMOD	4.6422	7.57e-13	7.16e-11	202.848	3595.42
HKDC1	2.12282	7.07e-09	3.36e-07	25.3333	96		KRT15	-2.64299	8.4e-13	7.92e-11	66874.3	7716.83
E2F2	2.09584	8.74e-09	4.06e-07	17.6667	62.6667		LINGO1	3.16975	8.54e-13	8.02e-11	18.6667	119.667
SNORD113/ENSOARG:23140	-2.0927	1.03e-08	4.71e-07	59.6667	13.6667		SMIM5	-2.06405	8.62e-13	8.06e-11	316	55.3333
SERPINB13	2.13162	1.06e-08	4.82e-07	220	803.667		MYH11	5.87733	9.33e-13	8.71e-11	8736.81	358433
CPAMD8	-2.12997	1.23e-08	5.54e-07	394.333	76.6667		BARX1	2.9078	9.46e-13	8.8e-11	44	235.333
DUOX2	3.75343	1.26e-08	5.65e-07	135.395	1504.95		LMO3	4.26147	1.01e-12	9.32e-11	19.3333	264
NLRC5	4.04066	1.31e-08	5.87e-07	20	275.333		PPP1R14A	4.56234	1.09e-12	1.01e-10	76.3333	1303
S100A9	3.08103	1.62e-08	7.03e-07	6997.67	45541		S100A11	-2.06722	1.09e-12	1.01e-10	8283	1467
ENSOARG00000012404	-2.45526	1.73e-08	7.48e-07	149.667	23.3333		ENSOARG00000020190	4.14049	1.23e-12	1.11e-10	80.6667	1009
PRSS22	2.08942	1.74e-08	7.5e-07	881	3063.67		TMEM229B	-5.84816	1.23e-12	1.11e-10	4676.33	60.3333
ADGRF2	2.16836	2.32e-08	9.6e-07	72.6667	283.333		ANKRD23	4.29142	1.4e-12	1.26e-10	17	241.667
VSIG2	2.02305	2.61e-08	1.07e-06	94.247	323.815		ACACB	4.19999	1.46e-12	1.31e-10	79.552	1039.46
XKRX	2.31733	2.94e-08	1.19e-06	20.3333	85.3333		ENSOARG00000017260	-2.42207	1.55e-12	1.38e-10	144.608	19.5089
ENSOARG00000012585	3.70144	3.36e-08	1.35e-06	12.5594	138		PARM1	3.12745	1.73e-12	1.53e-10	137.667	883.667
ENSOARG00000004919	2.46125	3.47e-08	1.38e-06	3128.67	14342		ENSOARG00000008900	2.90763	1.82e-12	1.6e-10	344.819	1882.14
MATN4	-2.56854	3.83e-08	1.52e-06	75.3333	10.6667		ANTXR2	2.98892	1.86e-12	1.64e-10	747.095	3910.51
ENSOARG00000021080	2.9938	4.04e-08	1.59e-06	9963.33	72019		ADAMTSL4	3.4935	1.9e-12	1.66e-10	329.667	2712.33
MMP9	2.42324	4.41e-08	1.72e-06	11.2466	50.7143		RAP1GAP	-2.582	2.04e-12	1.78e-10	1044	129.667
IFI6	4.42629	5.4e-08	2.07e-06	61.3333	986		ENSOARG00000006272	-2.32731	2.08e-12	1.81e-10	435	60.6667
ISG15	6.23786	5.47e-08	2.09e-06	10.3333	625		IGSF5	-2.25661	2.51e-12	2.15e-10	221	33.3333
CRISPLD2	-2.1962	5.46e-08	2.09e-06	659	123.667		SMYD1	6.82596	2.53e-12	2.16e-10	34.3333	2688.67
ASB2	3.19795	7.36e-08	2.73e-06	56.4438	455.607		GEM	4.30435	2.79e-12	2.37e-10	60.3333	833.667
SPINK9	3.17487	8.53e-08	3.11e-06	45.3333	284		ENSOARG00000005463	-2.5987	2.8e-12	2.38e-10	492.667	58
ENSOARG00000026118	2.22206	8.88e-08	3.23e-06	770.24	3060.1		FXYD1	3.05616	2.9e-12	2.45e-10	186	1146.33
ESYT3	-2.01592	9.36e-08	3.39e-06	188	38.3333		TPM2	5.67384	2.97e-12	2.51e-10	2408	84333.6
KRT20	3.08618	9.65e-08	3.48e-06	19	136		SSPN	3.6194	2.99e-12	2.51e-10	37.3333	329.667
IGF2	-2.24724	9.96e-08	3.57e-06	4034.17	740.924		ENSOARG00000010303	-2.68607	3.04e-12	2.54e-10	822.667	94.3333
CYP4F22	3.02868	1.17e-07	4.13e-06	50	344.667		ENSOARG00000025412	4.23412	3.25e-12	2.71e-10	58.4344	781.773
ENSOARG00000016969	-2.44862	1.52e-07	5.23e-06	101.667	16		SLC25A4	3.22805	3.27e-12	2.72e-10	538	3610.67
ENSOARG00000002875	3.09823	1.52e-07	5.24e-06	146.202	1020.28		SLC22A5	-2.34889	3.46e-12	2.87e-10	2542.77	366.418
MROH5	-2.43027	1.8e-07	6.14e-06	199.667	30.3333		PPFIA4	3.84455	3.92e-12	3.23e-10	20.3333	214.667
GLIS1	-2.02448	2.04e-07	6.83e-06	63	13		NOL3	3.08247	4.05e-12	3.33e-10	37.6667	228.333
ENSOARG00000015707	2.16325	2.07e-07	6.92e-06	69.9719	198.166		DPYSL3	3.40043	4.47e-12	3.66e-10	783.333	5883.67
SPINK7	3.64049	2.09e-07	6.96e-06	23.3333	204		SH3BGR	5.32758	4.68e-12	3.8e-10	164.333	4575.67
TDRKH	-2.31074	2.11e-07	7.03e-06	165.257	29.3333		DSTN	2.53206	5.42e-12	4.37e-10	3397.33	13962.3
ENSOARG00000015002	2.66355	2.37e-07	7.75e-06	600.668	2966.21		FHL1	3.29062	5.56e-12	4.46e-10	531.667	3670
DPF3	2.16604	2.46e-07	8e-06	11.3333	44		TGFB1I1	3.64277	5.61e-12	4.49e-10	283.667	2553
ENSOARG00000000716	-2.14303	2.77e-07	8.95e-06	54.2712	10.7755		ENSOARG00000016991	3.7019	5.88e-12	4.7e-10	15	147.333
PTPRC	2.99103	3.08e-07	9.76e-06	48	315		PSD	3.50087	5.93e-12	4.72e-10	163.667	1326
S100A8	3.10249	3.25e-07	1.02e-05	9920	61461.7		ADARB1	2.72489	6.02e-12	4.78e-10	86.3333	416.667
SERPINE1	3.29427	3.65e-07	1.13e-05	54.6667	440		PPP1R3B	-2.53794	6.34e-12	5e-10	182.333	23
ENSOARG00000014187	-2.14677	3.61e-07	1.13e-05	201.376	40.2899		CA9	4.09494	6.89e-12	5.4e-10	17.6667	215.333
PENK	-2.21277	4.1e-07	1.26e-05	462	84.6667		CACNA1C	3.78968	7.06e-12	5.52e-10	220.667	2213.33
TRHDE	2.09737	5.82e-07	1.7e-05	15	55.3333		GNAO1	3.28291	7.36e-12	5.74e-10	18.3333	132.667
TAP1	2.35668	6.78e-07	1.95e-05	144	604.333		CCDC13	2.59445	7.79e-12	6.05e-10	21.6667	97
VWCE	-2.04649	7.22e-07	2.06e-05	134.333	27.3333		HIST2H2BE	2.54854	9.99e-12	7.72e-10	129.289	543.333
ENSOARG00000002722	2.26972	7.39e-07	2.1e-05	23.8825	99.4937		ENSOARG00000020189	3.74832	1.03e-11	7.92e-10	30.3333	296.667
MX2	5.35762	7.99e-07	2.25e-05	12.6667	442.667		VGLL3	3.45845	1.03e-11	7.92e-10	15	121.333
VSIG8	2.31337	8.22e-07	2.31e-05	70.6667	302.333		OCA2	3.41072	1.06e-11	8.08e-10	27.5456	212.331
TMPRSS2	3.05808	9.65e-07	2.66e-05	44	295.333		ENSOARG00000014843	-6.54846	1.06e-11	8.08e-10	5680.06	43.0971
S100A12	2.44204	9.83e-07	2.7e-05	17832.7	69908.3		ATP10A	3.87612	1.12e-11	8.49e-10	43.6667	461.333
MKRN2OS	2.12707	1.07e-06	2.91e-05	47	165		SMARCD3	3.41262	1.12e-11	8.49e-10	335.487	2596.99
CORO1A	3.09645	1.1e-06	2.96e-05	42.3333	285.333		TINAGL1	3.24017	1.16e-11	8.8e-10	238.49	1615.36
ELOVL4	2.68849	1.33e-06	3.49e-05	16.6667	89.6667		ENSOARG00000009066	5.21786	1.19e-11	8.97e-10	117.333	2927.56
GIF	-2.57603	1.33e-06	3.5e-05	259.333	34.3333		PNCK	5.40001	1.21e-11	9.09e-10	21	614.667
B4GALNT2	3.15016	1.53e-06	3.95e-05	248.333	1867.33		JPH2	4.80112	1.23e-11	9.14e-10	43	850.333
HAPLN3	2.13029	1.74e-06	4.43e-05	15.3333	57.6667		RYR2	3.47436	1.41e-11	1.04e-09	30.6667	246
ENSOARG00000003707	-2.01139	1.77e-06	4.51e-05	6115.17	1339.74		N4BP3	-2.19975	1.54e-11	1.13e-09	969.667	153.333
NKPD1	2.45643	2.28e-06	5.66e-05	42.3333	202		DMPK	3.30613	1.57e-11	1.15e-09	1759.46	12750
IL2RG	3.07886	2.36e-06	5.84e-05	21	144.333		MUC1	-5.89406	1.71e-11	1.24e-09	1626.33	20.3333
ERO1A	2.12834	2.54e-06	6.18e-05	1076.67	4010		PDLIM7	3.9195	1.75e-11	1.27e-09	1080.33	11760.3
S100A4	2.11895	4.4e-06	9.93e-05	423.667	1332.67		PDZRN4	4.26725	1.8e-11	1.3e-09	26	349.333
CLDN3	2.19052	5.27e-06	0.000115768	13.4114	52.8672		ENSOARG00000000862	2.78896	1.81e-11	1.3e-09	346.667	1718.33
QPCT	2.66592	5.61e-06	0.00012203	48	247.333		ZCCHC24	2.91932	2.03e-11	1.45e-09	130	709
B2M	2.42935	5.86e-06	0.000126842	1975	7945		FRZB	4.22322	2.08e-11	1.49e-09	42	577.667
TNNT1	-2.73833	5.91e-06	0.00012791	372.333	48.3333		SUSD1	-2.20608	2.12e-11	1.5e-09	870.626	135.859
ENSOARG00000015866	2.18745	6.47e-06	0.000138892	102.056	372.506		CYP26A1	3.31566	2.21e-11	1.56e-09	289	2017.33
SRGN	2.26813	7.04e-06	0.000149889	26.6667	98		DAPL1	-2.50265	2.54e-11	1.79e-09	2500.53	306.521
CTSL	2.54898	7.46e-06	0.000157481	22	112.672		CLIP4	-2.77101	2.81e-11	1.98e-09	1007.67	107.333
UBASH3B	2.18489	8.77e-06	0.000181856	31	120.333		CYP26C1	3.69177	2.96e-11	2.07e-09	11	101.667
LCP2	2.58251	9.53e-06	0.000195863	13.6667	68.3333		ACOT11	3.17527	2.95e-11	2.07e-09	47.6667	321
BEST2	2.36394	9.58e-06	0.000196734	53.6667	243.333		MYOM1	6.04759	3e-11	2.09e-09	24.6667	1111.67
SKAP1	2.58523	1.01e-05	0.000206376	10.6667	52.6667		DAAM2	3.12197	3.04e-11	2.11e-09	770.019	4851.26
NCKAP1L	2.12299	1.06e-05	0.000215817	43	154.333		ENSOARG00000002997	3.05639	3.21e-11	2.23e-09	13.3333	80.3333
MFAP3L	3.28857	1.11e-05	0.00022413	14	116.333		EMILIN3	-2.50508	3.44e-11	2.38e-09	152	19.6667
ENSOARG00000002881	2.56147	1.18e-05	0.000235278	122.159	611.445		SYNC	4.19024	3.5e-11	2.42e-09	24.3333	314.333
MYO1G	3.00061	1.2e-05	0.0002391	10.6667	71		ADH6	4.28632	3.76e-11	2.59e-09	40	536.667
ENSOARG00000010944	2.86142	1.3e-05	0.000255528	11.3333	69		FAM105A	2.114	4e-11	2.73e-09	105.618	316.063
ENSOARG00000010070	2.31427	1.41e-05	0.000273137	31	126		DGKE	2.22207	4.03e-11	2.75e-09	53.3333	180.667
JAKMIP2	-2.65388	1.45e-05	0.000278794	220	30.6667		RYR3	3.69559	4.13e-11	2.8e-09	59.6667	551.667
SYCP3	-2.31398	1.64e-05	0.000311535	97	16.3333		KLHL23	4.54861	4.25e-11	2.88e-09	35.3333	559.667
C6orf15	-3.57659	1.66e-05	0.000313713	198	14.6667		DYNC1I1	3.20491	4.43e-11	2.99e-09	22.6667	153
ENSOARG00000014069	2.67274	1.7e-05	0.000320254	117.892	586.262		CCDC69	3.53742	4.65e-11	3.13e-09	47	392
FGF13	-2.1858	1.77e-05	0.000330562	55.3333	10.3333		PLB1	-2.1925	4.71e-11	3.16e-09	140	22.3333
FRMPD1	2.21555	1.89e-05	0.000349478	58.6667	241.667		SORCS1	3.17002	4.97e-11	3.32e-09	16.6667	107
MX1	3.59703	1.99e-05	0.000365486	219.667	2256.33		EMP1	-3.35147	4.98e-11	3.32e-09	59289.3	4258.63
TRAC	4.9002	2.21e-05	0.000401994	19.6823	143.142		CDH19	3.43027	6.04e-11	4.01e-09	21.3333	162
CDSN	-2.88287	2.42e-05	0.00043544	175	21		ENSOARG00000010748	3.12547	6.2e-11	4.1e-09	70	444.333
GRIK3	-2.30498	2.44e-05	0.000437939	88.6667	15.6667		ATP12A	-5.68357	6.47e-11	4.27e-09	9089	125.333
ENSOARG00000014506	-2.27342	2.7e-05	0.000477618	209.121	34.0529		WFDC1	3.6648	6.58e-11	4.33e-09	271.333	2520.33
COLQ	-2.483	2.99e-05	0.000520407	255	39		OSR1	3.58508	6.64e-11	4.36e-09	37	316
ADORA2B	2.21385	3.03e-05	0.000526666	23.3333	88.6667		SCIN	-2.17434	6.74e-11	4.41e-09	409	65.3333
ITGB2	2.26636	3.2e-05	0.000552041	28.6667	110.667		ENSOARG00000025550	-7.88974	6.93e-11	4.53e-09	13300.8	40.6668
CD177	3.74576	3.2e-05	0.000552049	510.249	5870.65		AGPAT4	3.35587	7.17e-11	4.67e-09	12.3333	93.6667
DUOXA2	4.11307	3.22e-05	0.000555316	12.1794	167.534		B3GALT2	2.75038	7.32e-11	4.76e-09	14.3333	70.3333
ENSOARG00000004667	-2.77577	3.43e-05	0.000584028	1788.67	209.756		ENSOARG00000010366	2.7996	7.53e-11	4.89e-09	216.667	1074.33
KPRP	2.35589	3.45e-05	0.000586903	169.295	726.266		ARHGEF25	3.39395	7.64e-11	4.95e-09	377.193	2785.18
KCNE3	2.0497	3.68e-05	0.000621275	16	46.6667		PRR15L	-2.45429	8.05e-11	5.18e-09	122.667	16.6667
ENSOARG00000015646	2.70107	3.75e-05	0.000629459	75	363.47		ITGA4	-2.54534	8.56e-11	5.5e-09	177.333	22
ENSOARG00000026457	2.56824	3.85e-05	0.000643818	34.8896	180.06		ANGPTL1	3.3034	8.97e-11	5.73e-09	98	680.667
PITX2	-3.38224	3.88e-05	0.000646372	168	14		ADGRV1	-2.38554	9.16e-11	5.85e-09	1828.67	249.333
ENSOARG00000001701	2.93196	3.9e-05	0.000649756	13.3562	81.9484		STAC	4.12506	9.94e-11	6.3e-09	11.6667	151.333
FA2H	2.39259	4.4e-05	0.000717673	11	48		MAPRE2	2.0188	1e-10	6.35e-09	898.333	2630
TDRD10	2.08494	4.93e-05	0.000789719	16	57		NRP2	3.19986	1.03e-10	6.51e-09	221	1462
ENSOARG00000015448	-2.40294	5.18e-05	0.000821468	123.277	20		ENSOARG00000009079	2.36189	1.04e-10	6.52e-09	195	737.667
ENSOARG00000000463	2.02985	5.42e-05	0.000854122	42	115.667		TMEM38A	3.52008	1.06e-10	6.62e-09	24.6667	208.667
MAP4K1	2.30566	5.49e-05	0.000863045	21	85		CAV1	2.57839	1.07e-10	6.69e-09	687	2922.33
ENSOARG00000017148	-2.02275	6.28e-05	0.000968616	52.1132	10.9552		ENSOARG00000013589	-3.46801	1.09e-10	6.82e-09	179.616	12
SRD5A2	2.64804	7e-05	0.00106287	14.6667	76		TMEM173	-2.60819	1.12e-10	6.94e-09	622.333	74
TRPM2	2.79042	9.18e-05	0.00133817	26.3333	143.667		ENSOARG00000011490	-3.23533	1.12e-10	6.97e-09	1012.13	77.0477
CD2	2.03901	9.32e-05	0.00135287	31.6407	108.156		NACC2	3.25332	1.25e-10	7.74e-09	197.333	1357.67
PHOSPHO1	-2.32265	0.000102898	0.00146671	84	14		NKAIN1	3.74788	1.28e-10	7.91e-09	39	378.667
ENSOARG00000007427	3.20515	0.000119473	0.00165651	12	91		ENSOARG00000006882	3.52443	1.28e-10	7.91e-09	26.3333	217
CTSW	2.13817	0.00015097	0.00201796	14	50		MUC15	-2.52718	1.33e-10	8.19e-09	2759	338.332
ENSOARG00000019966	2.0226	0.000177232	0.00229968	424.012	1504.88		JAZF1	3.14516	1.35e-10	8.29e-09	43.4452	275.318
IFI44	2.59466	0.000233099	0.00288089	27.985	147.458		PRSS23	2.49915	1.43e-10	8.72e-09	208	866.333
ENSOARG00000005823	-2.12066	0.000264774	0.003195	64.0016	12.9021		CAMKK2	2.79425	1.5e-10	9.15e-09	190	960
ENSOARG00000004127	2.37383	0.00030911	0.00363381	24	109		FABP7	4.54428	1.63e-10	9.92e-09	45.6667	733
ENSOARG00000009963	3.29952	0.000383084	0.00436378	76.8874	640.165		LRRN1	3.88777	1.69e-10	1.03e-08	50	525.333
ENSOARG00000022103	-3.46106	0.000450715	0.00499739	313	29.6667		PGM5	3.19886	1.7e-10	1.03e-08	908.667	5949.33
APOBEC1	2.60078	0.000483984	0.00530351	542.333	2610.33		ENSOARG00000009057	2.4868	1.89e-10	1.14e-08	163.615	662.153
ENSOARG00000013067	-2.31137	0.000489604	0.00535615	6403.33	1130.33		TTLL7	2.73429	1.92e-10	1.15e-08	21.3333	101
XAF1	2.03036	0.000511138	0.00554909	77.3333	254.667		PKIG	2.92519	1.97e-10	1.18e-08	73.6667	414.333
WAS	2.07285	0.000544821	0.00586068	12	40.6667		ENSOARG00000017379	3.36742	2.01e-10	1.2e-08	35.6078	266.491
FYB	2.52657	0.000578618	0.00614603	11.6667	55.6667		SCNN1B	-3.61719	2.02e-10	1.2e-08	712.333	42
ENSOARG00000004202	2.03783	0.000580715	0.00615863	2352.01	7342.01		FNBP1	2.47612	2.14e-10	1.27e-08	1316.31	5344.35
ENSOARG00000016470	2.47158	0.000584204	0.00618835	168	726.333		DBNDD2	2.249	2.26e-10	1.34e-08	85	299.333
SLC5A8	2.65801	0.000642493	0.00668281	141.333	757		ENSOARG00000004859	-3.07859	2.27e-10	1.34e-08	1703	152.667
ENSOARG00000001181	3.44181	0.000735581	0.00745892	13.3723	134.975		BAG2	3.00514	2.32e-10	1.36e-08	439	2491.33
ENSOARG00000009552	2.6241	0.000853515	0.00836353	40.6956	196.357		SLC43A1	2.93971	2.34e-10	1.37e-08	241.667	1346
SPTB	-2.31511	0.00100302	0.00948798	179	32.6667		ST8SIA5	4.24618	2.37e-10	1.38e-08	21.3333	296
ENSOARG00000019272	2.01382	0.00101523	0.00956822	44.6667	147.667		HMCN2	2.81495	2.68e-10	1.56e-08	288.667	1441
ENSOARG00000002143	2.16194	0.00102038	0.0096052	33.9535	124.277		OLFML2A	-2.05302	2.71e-10	1.57e-08	726	128.374
ENSOARG00000001165	2.49667	0.00102931	0.00966237	56.6564	243.734		ITGBL1	3.36207	2.89e-10	1.66e-08	32.6667	239.667
MYO18B	-2.28644	0.00103117	0.00967646	66.6667	11		PPARGC1A	3.67726	3e-10	1.72e-08	15	135
ENSOARG00000010572	5.1067	0.00111159	0.0102603	10.2559	256.893		DDAH1	3.05405	3.05e-10	1.75e-08	86	516.333
ENSOARG00000019243	2.50933	0.00117528	0.010769	12.445	59.2728		CAP2	3.22206	3.24e-10	1.85e-08	216.667	1428
IL1A	2.01117	0.00127954	0.0115736	21.3333	72		ENSOARG00000018972	2.77617	3.3e-10	1.89e-08	34.3333	171
TRAF3IP3	2.0407	0.00128803	0.0116155	18.6667	62.3333		SMIM1	3.55561	3.4e-10	1.93e-08	18.6667	168
ENSOARG00000005549	5.70515	0.00129951	0.0116991	75.2282	2966.19		ZYX	2.8174	3.59e-10	2.03e-08	1597	8350.67
ENSOARG00000000746	3.01419	0.00143192	0.0126598	190.667	993.667		PLCB4	2.39535	3.63e-10	2.05e-08	218.941	804.977
ENSOARG00000019163	2.89917	0.00150202	0.0131507	18.3333	123.667		PKDCC	3.36859	3.76e-10	2.12e-08	92.6667	684
ENSOARG00000002985	2.05828	0.00191133	0.0158568	64.8228	245.877		WSCD2	3.31382	3.78e-10	2.12e-08	53.3333	382.667
ATP13A5	-3.54018	0.00198815	0.0163488	452.667	33.3333		ENSOARG00000017264	3.17156	3.82e-10	2.14e-08	12.3333	80.6667
ADTRP	2.05561	0.00204618	0.016689	111.667	392.333		RASGRP2	2.39225	3.86e-10	2.15e-08	117.017	447.067
DGAT2	2.21962	0.00240826	0.018973	20	75.6667		C5orf46	-2.27585	3.99e-10	2.22e-08	526.333	81.3333
SLC9A4	2.02435	0.00279554	0.0213104	18	61.3333		PLEKHA7	-2.53138	3.99e-10	2.22e-08	1050.36	136.453
ADH6	2.03629	0.00289909	0.0219328	10.6667	40		PDE4DIP	2.61984	4.02e-10	2.23e-08	346	1545
ENSOARG00000012115	-2.72751	0.00390178	0.0277973	77.314	10.4611		PLEKHO1	2.92639	4.12e-10	2.27e-08	499	2770
ABCA10	-2.08747	0.00439667	0.0305072	64	13		ENSOARG00000017394	-2.36361	4.13e-10	2.27e-08	135.667	19
TREML2	2.21875	0.00530979	0.0353986	12.3333	45.6667		THBS3	2.83773	4.41e-10	2.42e-08	296.333	1507.67
PI3	2.91329	0.00589084	0.0384675	491	3105.33		ABCC1	2.30522	4.45e-10	2.44e-08	235.333	851.333
XDH	3.67257	0.00700273	0.0440893	72	824		NDRG4	2.56917	4.84e-10	2.63e-08	248.667	1044.33
							ENSOARG00000018704	2.7039	5e-10	2.71e-08	40.3333	197.333
							FADS2	3.24515	5.09e-10	2.76e-08	154	1032
							CYP2B6	-4.5923	5.41e-10	2.91e-08	5519.47	168.444
							CLCN4	-2.38826	5.71e-10	3.06e-08	164.333	22.3333
							GFPT2	3.302	5.93e-10	3.15e-08	42	289.667
							PRKRA	2.88461	5.91e-10	3.15e-08	70	369
							SLC15A1	-2.93623	5.9e-10	3.15e-08	759.333	70.3333
							FERMT2	2.84374	5.96e-10	3.16e-08	651.666	3334.67
							NMNAT3	-2.07657	6.26e-10	3.32e-08	111.667	19
							HOXB6	2.31677	6.35e-10	3.35e-08	95.8536	342.074
							ACTA1	5.57993	6.49e-10	3.42e-08	101.674	3271.27
							AHRR	-3.18921	6.96e-10	3.66e-08	163	13
							KLHDC8B	2.29577	7.68e-10	4e-08	212	748
							POPDC2	5.3663	7.81e-10	4.06e-08	23.3333	662.667
							SGCB	2.02695	7.83e-10	4.06e-08	467.455	1333.34
							ANPEP	-2.39139	8.51e-10	4.4e-08	286	36.3333
							ISLR2	3.74456	8.74e-10	4.5e-08	20.3333	189.333
							SUSD4	-2.78997	8.72e-10	4.5e-08	125.667	13.3333
							ZDHHC2	2.70707	8.8e-10	4.52e-08	31.3333	147.667
							ENSOARG00000004027	2.59967	9.19e-10	4.71e-08	279.443	1222.9
							PART1_2	-2.53035	9.97e-10	5.1e-08	99.3333	12.6667
							ENSOARG00000018194	3.40646	1.02e-09	5.18e-08	862.332	6045.33
							SLC26A10	3.2649	1.02e-09	5.18e-08	158.667	1109.33
							TLN1	2.8074	1.02e-09	5.18e-08	4013.67	20490.3
							LMO7	-2.41259	1.01e-09	5.18e-08	7279	999.665
							RNFT2	2.79828	1.04e-09	5.24e-08	25	127.667
							MCAM	2.90987	1.06e-09	5.34e-08	1236.37	6634.33
							NPNT	-2.12118	1.1e-09	5.55e-08	757.333	128.667
							ZNF385D	2.46367	1.15e-09	5.75e-08	93.5499	367.653
							SYT8	-3.75104	1.21e-09	6.04e-08	329.333	18
							STX1A	2.08752	1.22e-09	6.07e-08	26.6667	83.6667
							ARG1	-4.11917	1.25e-09	6.2e-08	3684.67	152
							FAM189A2	2.01838	1.31e-09	6.51e-08	63.6667	186
							MAMDC2	2.02906	1.33e-09	6.57e-08	90.6667	259.667
							LPP	2.16587	1.37e-09	6.76e-08	110.667	360
							ENSOARG00000016494	-2.04449	1.51e-09	7.44e-08	669	118
							ITGA9	2.47444	1.56e-09	7.62e-08	632.624	2523.23
							PPEF1	-2.03677	1.59e-09	7.78e-08	210	36.6667
							C1QTNF1	2.88534	1.7e-09	8.29e-08	147	791.667
							GYG1	2.53654	1.71e-09	8.31e-08	426.269	1773
							CAVIN2	2.82484	1.79e-09	8.65e-08	269	1369.33
							COL4A2	2.93963	1.83e-09	8.85e-08	4738	26702.7
							GPC3	-2.44141	1.93e-09	9.32e-08	723.667	95
							ENSOARG00000025893	-2.2329	2.03e-09	9.77e-08	96.772	14.9671
							MTUS2	5.09135	2.2e-09	1.05e-07	29.6667	767.333
							ENSOARG00000006940	2.08154	2.2e-09	1.05e-07	66.3333	214
							PADI1	-2.03474	2.24e-09	1.07e-07	20698.3	3667
							DPT	2.36345	2.37e-09	1.13e-07	687.333	2516
							TOX3	-2.62066	2.46e-09	1.16e-07	91.6667	10.6667
							ENSOARG00000001434	2.9275	2.49e-09	1.18e-07	62	342.667
							ENSOARG00000012216	4.04572	2.56e-09	1.21e-07	12	141.333
							L1CAM	2.16119	2.61e-09	1.22e-07	67.3333	219
							ITGA1	2.44651	2.69e-09	1.25e-07	115	441.333
							TFAP2C	-3.52035	2.79e-09	1.3e-07	383	24
							CCDC190	5.55384	3.09e-09	1.43e-07	14.6667	468
							ARHGAP6	3.49639	3.13e-09	1.44e-07	50	415.667
							ROR2	3.0928	3.11e-09	1.44e-07	88.6667	536.667
							CAVIN1	2.64093	3.16e-09	1.46e-07	1242.67	5683.67
							PLEKHH2	2.54126	3.2e-09	1.47e-07	189.764	767.295
							ENSOARG00000025193	4.35902	3.31e-09	1.51e-07	335.556	4850.38
							CAND2	3.10395	3.45e-09	1.57e-07	82	513.333
							PTGIS	4.07927	3.5e-09	1.58e-07	180.333	2138.67
							ACER1	2.73112	4e-09	1.79e-07	115.333	532.667
							GRIP1	-2.30015	4.17e-09	1.86e-07	154.667	22.6667
							ENSOARG00000007620	2.18105	4.21e-09	1.88e-07	67	220.667
							SORCS2	3.24826	4.48e-09	1.99e-07	17	119
							SLITRK2	3.02804	4.55e-09	2.02e-07	304.667	1711.33
							ENSOARG00000016118	2.44062	4.76e-09	2.1e-07	150.935	582.93
							PPL	-2.75397	4.79e-09	2.11e-07	32190.3	3482.67
							ENSOARG00000002009	3.00183	4.92e-09	2.16e-07	91.3333	531.667
							SSC5D	3.42187	5.18e-09	2.27e-07	281.285	2208.46
							BTBD3	-2.07522	5.23e-09	2.29e-07	1662.33	281.333
							MFSD4A	-2.84893	5.38e-09	2.35e-07	221.667	23
							REPS2	-3.08275	5.57e-09	2.43e-07	123.667	10.3333
							MYL6	2.78537	5.61e-09	2.44e-07	7877.09	38874.1
							ARHGEF28	3.06082	5.8e-09	2.52e-07	84.3333	501.667
							HACD1	2.50186	5.82e-09	2.52e-07	130.333	517.333
							FGL2	2.55126	6.07e-09	2.62e-07	108	440.333
							COX7A1	2.46429	6.45e-09	2.78e-07	123	515.333
							EMILIN1	3.25372	6.49e-09	2.79e-07	610.333	4172.67
							ENSOARG00000011143	3.62462	6.8e-09	2.92e-07	14.6667	128.333
							PPP1R1A	3.95915	7.35e-09	3.13e-07	24.3333	259.333
							PATL2	2.97536	7.78e-09	3.29e-07	47.3333	274
							SCUBE2	2.71292	8.54e-09	3.6e-07	149	697.334
							SLC16A7	2.644	8.63e-09	3.63e-07	45.3333	201.667
							HDAC9	2.44898	8.65e-09	3.63e-07	37	145.333
							MSRB3	3.02327	9.11e-09	3.81e-07	201.667	1180
							ENSOARG00000004617	-4.97967	9.27e-09	3.88e-07	1024	23
							CAMK2G	2.3134	9.5e-09	3.96e-07	931.667	3355.67
							SLC6A20	-2.06297	9.56e-09	3.99e-07	128.202	22.3333
							BTC	2.6652	9.87e-09	4.11e-07	24.3333	112.667
							DYSF	2.57013	9.93e-09	4.13e-07	480.667	2081.33
							ENSOARG00000026255	4.20376	1.01e-08	4.2e-07	11.2622	147.695
							ILK	2.52376	1.06e-08	4.39e-07	1058.33	4391.49
							FZD7	2.35773	1.15e-08	4.73e-07	45.1827	166.47
							FBP2	-2.05201	1.16e-08	4.79e-07	1619.35	279.225
							ENSOARG00000024033	3.04039	1.18e-08	4.84e-07	21	121.667
							DENND2C	-2.00418	1.18e-08	4.84e-07	1517.67	273.333
							IDH1	-2.11967	1.19e-08	4.9e-07	17712.1	2892.53
							TMEM59L	2.86727	1.22e-08	4.98e-07	36.1607	192
							HS3ST1	-2.23407	1.24e-08	5.06e-07	251.333	38
							FAM84A	-2.01623	1.27e-08	5.18e-07	1832.67	326.333
							LY6G6D	-2.45821	1.28e-08	5.21e-07	486.602	62.7322
							SH3GL3	2.67298	1.29e-08	5.23e-07	21.6667	99
							ENSOARG00000001859	2.53664	1.3e-08	5.27e-07	218.383	926.77
							CBX7	2.07211	1.33e-08	5.37e-07	34	105.667
							LGALS1	3.19811	1.38e-08	5.56e-07	1071.33	7109
							P4HTM	2.39904	1.43e-08	5.75e-07	172.911	658.402
							DNA2	-2.05487	1.43e-08	5.76e-07	120.667	20.6667
							ENSOARG00000015928	2.1136	1.46e-08	5.88e-07	43.6667	132
							CSDC2	2.27037	1.47e-08	5.9e-07	16.6667	59.6667
							PKD2	2.04438	1.5e-08	6.01e-07	410	1206
							ANKRD34A	2.35195	1.57e-08	6.26e-07	14.3333	54.3333
							ENSOARG00000025687	2.8023	1.6e-08	6.39e-07	93.1928	361.283
							ENSOARG00000001254	3.19819	1.62e-08	6.44e-07	1273	8350
							GALNT3	-3.53514	1.63e-08	6.47e-07	764.333	48
							GLUL	-2.68541	1.72e-08	6.83e-07	19252.7	2184
							AK1	2.88936	1.83e-08	7.23e-07	51.6667	279.333
							ACTN3	3.15716	1.87e-08	7.35e-07	15	99.3333
							RBM24	3.19748	2.03e-08	7.94e-07	32.3333	208.667
							AQP5	-3.82642	2.11e-08	8.24e-07	12828.3	638.333
							KANK2	2.80435	2.16e-08	8.4e-07	594.465	3060.51
							KCNQ4	2.97146	2.23e-08	8.66e-07	34.3333	194
							RIMS3	4.13744	2.27e-08	8.78e-07	23	296.333
							NDNF	-2.28088	2.28e-08	8.81e-07	967.333	146
							ENSOARG00000009427	3.5494	2.38e-08	9.18e-07	208.333	1738
							SLK	-2.16478	2.49e-08	9.54e-07	5225	833.333
							EHD2	2.63741	2.5e-08	9.57e-07	742.667	3373.33
							RCN1	2.8744	2.51e-08	9.59e-07	594.667	3096.33
							CHST4	-2.19051	2.54e-08	9.7e-07	3276.33	514.667
							RUNX1	-2.15033	2.58e-08	9.84e-07	104	16.6667
							TACC1	2.42688	2.62e-08	9.98e-07	296.667	1173.67
							MTMR7	2.74408	2.64e-08	1e-06	26	124.333
							ANGPTL2	2.0522	2.67e-08	1.01e-06	273.333	820
							SCARA5	2.63625	2.69e-08	1.02e-06	131.333	573.333
							ESYT1	2.33594	2.7e-08	1.02e-06	843.333	3091
							CATSPER3	-2.10312	2.7e-08	1.02e-06	132.667	22
							THSD7A	2.9599	2.74e-08	1.03e-06	15.6667	89.3333
							DUSP10	2.35615	2.78e-08	1.05e-06	33.6667	124.667
							C1orf228	-2.17528	2.85e-08	1.07e-06	252.667	39.3333
							CILP	5.07508	3.21e-08	1.2e-06	81	1871.33
							ENSOARG00000011855	2.85555	3.24e-08	1.2e-06	64.3333	331.333
							ST8SIA4	-2.19214	3.57e-08	1.31e-06	146.333	23
							ENSOARG00000020353	2.47083	3.68e-08	1.36e-06	261	808.333
							PDZRN3	3.05425	3.72e-08	1.37e-06	130.667	784
							TSPOAP1	2.28404	3.73e-08	1.37e-06	118.667	422.333
							PRELP	2.52013	3.79e-08	1.38e-06	190	816.333
							ENOX1	3.07279	3.91e-08	1.42e-06	25.6667	154.667
							COL4A1	2.84444	4.01e-08	1.46e-06	9762.33	51036.3
							LDLRAD4	2.72341	4.06e-08	1.47e-06	40.3333	194
							PCP4	4.49183	4.18e-08	1.51e-06	186.333	2904.33
							IKZF2	-3.24008	4.15e-08	1.51e-06	292.667	22.3333
							COL15A1	2.75073	4.32e-08	1.55e-06	1331	6420.67
							ENSOARG00000016773	-2.07696	4.31e-08	1.55e-06	150.621	25.5673
							B4GALNT1	3.04226	4.38e-08	1.57e-06	22.6667	135
							RHOBTB1	2.35241	4.48e-08	1.6e-06	146	539.333
							PFKFB3	-3.12537	4.48e-08	1.6e-06	621	53.3333
							HMCN1	4.65915	4.62e-08	1.64e-06	36.6667	643.667
							JAM3	2.40022	4.93e-08	1.74e-06	366.196	1400.17
							ADAMTSL3	2.82846	4.96e-08	1.75e-06	55.3333	280.416
							SHF	2.08913	5.13e-08	1.8e-06	274.341	854.088
							SRF	2.15554	5.18e-08	1.82e-06	384.667	1275.33
							SPARCL1	2.39026	5.23e-08	1.83e-06	3666.67	13643.7
							MYO5C	-2.06462	5.4e-08	1.88e-06	471.667	80
							ABCA13	-2.87234	5.39e-08	1.88e-06	164	16
							TREX2	-2.64582	5.43e-08	1.89e-06	906	108
							PNLIPRP3	-2.26674	5.49e-08	1.91e-06	963.333	146.333
							EMP3	2.22684	5.6e-08	1.94e-06	159.333	537.333
							FN1	3.64476	5.63e-08	1.95e-06	3762.33	32999.3
							SGCD	3.18188	5.69e-08	1.96e-06	15.6667	102.333
							EML1	2.74083	5.76e-08	1.98e-06	291.667	1408.67
							APOBEC1	-4.70819	5.81e-08	1.99e-06	2610.33	74.6667
							GRIA3	3.27397	5.86e-08	2e-06	18.3333	125.333
							GRHL2	-2.22956	5.83e-08	2e-06	1244.67	189.667
							SLITRK5	4.21645	5.91e-08	2.02e-06	42.8601	557.422
							LSAMP	3.53488	6.08e-08	2.07e-06	17.3333	144
							PFKM	2.09587	6.08e-08	2.07e-06	234.667	721.333
							INPP5A	2.07522	6.09e-08	2.07e-06	950	2902.67
							NOXO1	-2.5478	6.38e-08	2.16e-06	1161.33	142.333
							PLPP7	2.83531	6.43e-08	2.17e-06	21.6667	112.667
							KRT36	3.9168	6.5e-08	2.19e-06	6384.27	69503.2
							ENSOARG00000004828	-2.03075	6.75e-08	2.27e-06	2407.75	417.874
							ITGA8	2.3293	6.98e-08	2.33e-06	114	411.333
							ENSOARG00000002041	2.34487	7.39e-08	2.45e-06	31.7653	116.452
							FNDC5	3.22259	7.67e-08	2.53e-06	22	150.667
							ACTB	2.32089	7.74e-08	2.55e-06	13253.6	49449.6
							COL17A1	-2.32757	8.04e-08	2.64e-06	25848.7	3724
							CHRM2	3.54974	8.08e-08	2.65e-06	23.3333	189.667
							TTC23	2.29904	8.2e-08	2.69e-06	92.6667	323
							SRPX2	3.60674	8.31e-08	2.72e-06	26.7796	231.828
							ENSOARG00000000330	-2.03484	8.44e-08	2.76e-06	46533.7	8167.33
							ENSOARG00000013593	3.03413	8.66e-08	2.82e-06	19.8699	118.409
							ZBTB47	2.3898	8.64e-08	2.82e-06	424	1617.67
							SORBS1	2.9517	9.63e-08	3.13e-06	1092	6103.67
							ENSOARG00000005213	2.33769	1.03e-07	3.34e-06	13	51.6667
							LARGE1	2.10899	1.08e-07	3.46e-06	206.333	645
							MYH1	4.33908	1.08e-07	3.47e-06	17.6446	260.974
							AGBL2	2.20769	1.08e-07	3.47e-06	33.3333	109.333
							FHOD3	2.99912	1.12e-07	3.58e-06	56.6667	325.667
							FABP3	2.1244	1.12e-07	3.59e-06	94	294.667
							EPHA8	-2.23668	1.16e-07	3.67e-06	82.7908	12.8424
							FIBIN	2.98114	1.18e-07	3.74e-06	137.667	847.667
							CRNN	-7.42532	1.19e-07	3.77e-06	52089.2	220
							PRICKLE2	3.07433	1.2e-07	3.81e-06	32.6667	197.667
							GALNT16	3.27633	1.23e-07	3.86e-06	52.3333	359.667
							ENSOARG00000002794	-2.27038	1.23e-07	3.86e-06	92.6667	13.6667
							EDAR	-3.45448	1.24e-07	3.9e-06	186.745	12.0471
							POU6F1	2.00878	1.29e-07	4.04e-06	133.432	390.489
							CIB2	2.20875	1.3e-07	4.05e-06	141.333	484.333
							MAP1B	2.61232	1.43e-07	4.43e-06	70.3333	305
							FAM131B	3.11254	1.55e-07	4.79e-06	18.3333	114.667
							DCLK2	3.49012	1.69e-07	5.18e-06	71.3333	575.667
							FILIP1	2.48649	1.76e-07	5.37e-06	146.333	582.667
							ENSOARG00000018588	-2.52162	1.76e-07	5.38e-06	495.667	62.3333
							ENSOARG00000013815	-2.16162	1.82e-07	5.54e-06	80.6667	13
							THBS1	2.44143	1.84e-07	5.61e-06	368.667	1489.67
							LRRN3	-3.18031	1.88e-07	5.72e-06	303	24
							SAMD4A	2.29588	2.01e-07	6.08e-06	73	262
							ADAMTS10	2.46308	2.05e-07	6.17e-06	213.667	860.333
							STX19	-2.67356	2.15e-07	6.45e-06	238	26.3333
							ART3	3.59705	2.16e-07	6.49e-06	13.6667	116.667
							FGF7	2.40365	2.25e-07	6.74e-06	33.6667	125
							ARHGEF19	-2.5764	2.27e-07	6.78e-06	1956	237
							ENSOARG00000019677	2.16573	2.28e-07	6.79e-06	111.333	360.333
							LTBP3	2.28636	2.29e-07	6.81e-06	645.056	2274.13
							KCNK3	2.64703	2.46e-07	7.32e-06	29.6667	135
							CNTFR	2.14363	2.58e-07	7.64e-06	85.3333	272
							DIXDC1	2.83107	2.7e-07	7.97e-06	71	362.667
							SERPING1	2.53312	2.77e-07	8.16e-06	581.667	2443.33
							DIP2C	2.14251	2.86e-07	8.4e-06	589.964	1889.66
							FAP	2.17585	2.87e-07	8.43e-06	148.333	467.333
							HSPG2	2.43974	3.02e-07	8.83e-06	3856.33	15292
							BMP5	-2.66258	3.06e-07	8.93e-06	89	10.3333
							ENSOARG00000018784	-2.20728	3.08e-07	8.98e-06	89	14
							FOXA1	-2.07898	3.1e-07	9.03e-06	408.667	69.6667
							PDE3A	2.62469	3.14e-07	9.13e-06	25.3333	110.333
							ENSOARG00000012562	3.35602	3.26e-07	9.45e-06	50	356
							ENSOARG00000000273	2.59773	3.34e-07	9.63e-06	55.1719	231.088
							GRID2IP	2.26361	3.33e-07	9.63e-06	27.6667	98.3333
							FNDC1	3.07917	3.36e-07	9.68e-06	288	1760
							ITIH5	2.43766	3.38e-07	9.72e-06	869.667	3356.33
							ENSOARG00000011945	2.52601	3.54e-07	1.01e-05	1315	5318.67
							S100B	3.35717	3.58e-07	1.02e-05	14.3333	104
							MEIS2	2.64292	3.62e-07	1.04e-05	193.743	864.667
							PLOD2	2.11903	3.65e-07	1.04e-05	213.333	658.333
							TCF7L1	2.0817	3.69e-07	1.05e-05	106.667	331.333
							NTNG1	2.5571	3.77e-07	1.07e-05	23.3333	111.667
							AHSG	-2.08678	3.82e-07	1.08e-05	10541.3	1740.33
							DGKB	2.76482	3.88e-07	1.1e-05	14.6667	70
							CWH43	-2.8747	3.87e-07	1.1e-05	1865.33	179
							LOXL1	2.59489	4.02e-07	1.13e-05	380.333	1676.33
							GPM6B	2.10199	4e-07	1.13e-05	48.8642	148.711
							ABCA10	3.69327	4.1e-07	1.15e-05	13	120.667
							SOX10	2.80251	4.14e-07	1.16e-05	16.7179	85.2603
							ATP1A2	2.22626	4.13e-07	1.16e-05	329.978	1111.66
							GLIS3	3.41005	4.19e-07	1.17e-05	11	87
							ENSOARG00000019001	2.19379	4.2e-07	1.17e-05	10.6667	36.6667
							FRY	2.39886	4.28e-07	1.19e-05	306.333	1148
							C14orf28	2.20505	4.32e-07	1.2e-05	37.6667	122.667
							CDK14	2.82183	4.35e-07	1.21e-05	97.0867	486.44
							TNC	3.10472	4.4e-07	1.22e-05	1130.33	7084
							ENSOARG00000002178	2.27615	4.54e-07	1.26e-05	51.8833	177.852
							ENSOARG00000009348	3.75548	4.71e-07	1.3e-05	11.6667	114
							TOX	2.59446	4.81e-07	1.33e-05	75.6667	327.07
							FAM69A	2.32185	4.92e-07	1.35e-05	56	201.667
							AQP3	-2.42019	4.9e-07	1.35e-05	15426.3	2082
							ARHGEF40	2.60006	4.96e-07	1.36e-05	609.667	2709.33
							SCG5	2.05366	5.06e-07	1.39e-05	49.6667	146
							PIP	3.07254	5.14e-07	1.41e-05	375	2113.33
							GPAT3	3.00202	5.17e-07	1.41e-05	59.3333	340.667
							WFIKKN2	2.59528	5.34e-07	1.45e-05	81.486	339.731
							ENSOARG00000026370	2.73704	5.36e-07	1.46e-05	12.6667	60
							CD248	2.51576	5.46e-07	1.48e-05	152.333	627
							ALPK3	2.71054	5.64e-07	1.52e-05	135.667	653
							ZFP42	-3.22261	5.91e-07	1.58e-05	146	11.3333
							ENSOARG00000025625	-2.08247	6.36e-07	1.69e-05	304.579	51.4898
							MTMR11	2.19195	6.65e-07	1.76e-05	148.667	498.667
							ENSOARG00000017016	3.76105	6.74e-07	1.78e-05	4048.3	38525.3
							APP	2.03573	6.81e-07	1.8e-05	6798.33	20015
							NPTXR	2.39282	6.85e-07	1.81e-05	107.333	411.667
							SERPINF1	3.75215	6.95e-07	1.83e-05	207	1897.67
							C20orf194	2.00386	7.04e-07	1.85e-05	168	480
							KRT17	3.8872	7.46e-07	1.96e-05	10167	108526
							BGN	2.73178	7.78e-07	2.04e-05	908.667	4276
							WNT10A	-2.2743	7.96e-07	2.08e-05	201.158	30.1493
							S1PR3	2.39423	8.13e-07	2.12e-05	21.6667	81.6667
							ENSOARG00000002942	2.93575	8.33e-07	2.16e-05	21.718	112.287
							RNASEL	-2.01439	8.49e-07	2.2e-05	1988	357.333
							CA8	2.66604	8.79e-07	2.27e-05	18	83.6667
							TMOD3	-2.01846	9.06e-07	2.33e-05	3231.67	570
							COPZ2	2.38341	9.26e-07	2.38e-05	182.333	683.333
							PTER	2.58642	9.33e-07	2.39e-05	20	88.6667
							PDE10A	2.38735	9.33e-07	2.39e-05	19.3333	74
							ENSOARG00000015209	-2.14355	9.28e-07	2.39e-05	93.6667	15.3333
							FAM166B	3.00662	9.41e-07	2.41e-05	11	66.3333
							DPYSL2	2.05818	9.64e-07	2.47e-05	1364.33	4106.34
							THADA	2.19809	9.79e-07	2.49e-05	814.069	2669.29
							NTRK2	-2.00076	9.74e-07	2.49e-05	331.667	58.3333
							ADIG	-2.16185	9.87e-07	2.51e-05	89.3333	14.6667
							C7	4.67007	1e-06	2.54e-05	303.962	5340.81
							PPP1R3C	2.36429	1.01e-06	2.56e-05	344.333	1321.33
							A1BG	2.02113	1.01e-06	2.56e-05	22.3333	66.6667
							PRRG4	-2.01483	1.02e-06	2.58e-05	182.333	32
							AKAP12	3.61704	1.07e-06	2.69e-05	212	1822.67
							TNFSF12	2.33414	1.1e-06	2.76e-05	64.6667	233.333
							MYOCD	2.82343	1.12e-06	2.79e-05	52.3333	269.333
							ADAM19	2.49695	1.23e-06	3.04e-05	394.667	1601.33
							CADM3	2.17468	1.24e-06	3.06e-05	38.3333	123.667
							INPP5J	-2.0468	1.24e-06	3.06e-05	113.667	19.6667
							PLXNB3	3.13912	1.24e-06	3.07e-05	14.3333	91.6667
							MUC20	-4.64084	1.25e-06	3.07e-05	1366	39.6667
							ARHGEF10	2.19207	1.3e-06	3.19e-05	217.333	719.333
							COL14A1	2.4159	1.33e-06	3.28e-05	1154.45	4305.52
							CCDC92	2.10206	1.35e-06	3.31e-05	35.3333	110.333
							ADGRB2	2.59892	1.36e-06	3.32e-05	89.6667	396.333
							ZFPM2	2.39963	1.36e-06	3.33e-05	38	141.333
							PRD-SPRRII	3.21044	1.37e-06	3.34e-05	2329.53	14568.6
							ITGB1	2.04397	1.37e-06	3.34e-05	5096.33	15095
							ENSOARG00000026979	2.60873	1.42e-06	3.45e-05	34.8741	149.893
							SOD3	2.7105	1.44e-06	3.51e-05	28.3333	136.667
							ASIC4	2.96801	1.46e-06	3.54e-05	11.6667	66.3333
							FAT2	-2.0792	1.47e-06	3.56e-05	1192	202.667
							VSTM2L	3.07278	1.5e-06	3.61e-05	11.4263	70.0688
							ENSOARG00000004703	2.00334	1.5e-06	3.61e-05	93.1128	278.582
							ENSOARG00000026667	2.52705	1.53e-06	3.67e-05	20	84.3333
							NCALD	2.18406	1.53e-06	3.67e-05	76.3333	252.667
							ENSOARG00000001928	2.15633	1.53e-06	3.67e-05	24.7414	80.2886
							PXN	2.15954	1.56e-06	3.73e-05	227.823	745.605
							ARSI	2.31976	1.57e-06	3.74e-05	16.3333	58.3333
							ENSOARG00000000630	2.05937	1.64e-06	3.89e-05	149	448
							CXCL12	2.07622	1.68e-06	3.98e-05	157.333	471.333
							ENSOARG00000020241	-2.51176	1.69e-06	4e-05	142.13	17.3445
							INHA	-2.58884	1.7e-06	4.03e-05	99.6667	12
							ENSOARG00000000655	-2.12247	1.75e-06	4.13e-05	389.797	62.9825
							SGCA	2.04333	1.76e-06	4.14e-05	248.333	734
							ENSOARG00000019055	-2.95711	1.86e-06	4.35e-05	107.881	10.3333
							ASB2	2.49175	1.86e-06	4.36e-05	455.607	1798.98
							IFT27	2.21037	1.86e-06	4.36e-05	128.333	439
							CAPS	2.00556	1.95e-06	4.56e-05	15	44
							ENSOARG00000008061	2.87394	2e-06	4.67e-05	54.5422	288.498
							BORCS5	2.2218	2.06e-06	4.79e-05	90	304.667
							WIPF1	2.1614	2.06e-06	4.79e-05	125.667	415.667
							AGR2	-2.67689	2.08e-06	4.84e-05	371.962	42.0795
							RBP4	2.73042	2.09e-06	4.85e-05	149	690.333
							PALLD	2.1045	2.13e-06	4.91e-05	1318.67	4162.33
							IGHM	-3.60133	2.17e-06	5e-05	289	17.3333
							HOXB7	2.27971	2.24e-06	5.17e-05	41.6667	147.598
							HAPLN3	2.05334	2.41e-06	5.51e-05	57.6667	171
							LCK	-2.52792	2.47e-06	5.63e-05	130.667	16.6667
							CLCN1	2.02791	2.47e-06	5.64e-05	42.3355	124.214
							MMP16	2.37947	2.52e-06	5.74e-05	244.667	898.333
							FBLN7	2.33077	2.62e-06	5.94e-05	44.6667	165
							S100A14	-2.70673	2.73e-06	6.17e-05	4921.33	560.667
							CIDEA	-3.10291	2.75e-06	6.23e-05	173	15
							CDR2L	2.20398	2.8e-06	6.32e-05	54.3333	185.667
							PHKG1	2.63558	2.81e-06	6.33e-05	38.3333	174
							ENSOARG00000010279	2.99768	2.82e-06	6.35e-05	12.3084	69.9285
							ENSOARG00000002982	2.11463	2.96e-06	6.63e-05	27.5846	87.955
							LAMC1	2.33767	3.05e-06	6.8e-05	3824	13969.3
							WASF3	2.38649	3.11e-06	6.93e-05	62.6667	238
							CAVIN3	2.11482	3.14e-06	6.97e-05	397.667	1250.33
							IFFO1	2.19352	3.39e-06	7.45e-05	39.6667	136.667
							PDLIM4	2.26237	3.45e-06	7.57e-05	119.667	415.333
							SLC52A3	-2.78729	3.52e-06	7.7e-05	515.667	55.3333
							LGI2	-2.18469	3.57e-06	7.78e-05	156.333	25.6667
							HIF3A	2.47466	3.8e-06	8.23e-05	187.666	769
							SLC6A14	-5.34863	3.8e-06	8.23e-05	6468.33	114
							KRT79	3.41822	3.81e-06	8.24e-05	158	1205
							ENSOARG00000006150	-3.22204	3.87e-06	8.33e-05	288	23.6667
							DHRS9	-2.09567	3.95e-06	8.5e-05	2020.67	335.333
							RAI14	2.01501	4.13e-06	8.86e-05	797.667	2351.33
							COL5A1	2.08416	4.15e-06	8.9e-05	4280.33	13248.3
							CACNB2	2.02282	4.27e-06	9.13e-05	95.6667	277.667
							RAB15	-3.48938	4.29e-06	9.16e-05	459	28.6667
							CXCL14	-2.04108	4.29e-06	9.17e-05	194	36
							FAM13C	2.1938	4.46e-06	9.48e-05	172.004	570.925
							FNDC4	2.28195	4.52e-06	9.57e-05	15.6667	54.6667
							ENSOARG00000007563	2.39123	4.57e-06	9.67e-05	12.667	48.3374
							MICAL3	2.00626	4.59e-06	9.7e-05	405	1183.33
							COL6A3	2.57522	4.64e-06	9.8e-05	4409.67	18688.7
							GPR87	-2.19485	4.65e-06	9.81e-05	1540	240.667
							GPX2	-3.1609	4.72e-06	9.94e-05	3510	282.333
							TRPC6	2.37661	4.87e-06	0.000102436	38	143
							SYDE1	2.12451	4.96e-06	0.000104108	77.3915	246.959
							LIX1L	2.03756	4.96e-06	0.000104108	130.667	386
							ENSOARG00000009032	2.10035	5.14e-06	0.000107584	20645	63512.7
							ENSOARG00000026832	-2.06635	5.14e-06	0.000107584	624	107
							REEP2	2.17245	5.19e-06	0.000108353	12.3333	40
							CCDC8	2.06891	5.35e-06	0.000111093	365	1100.67
							KLHL33	3.04534	5.42e-06	0.000112292	23	140.667
							TRIM31	2.37905	5.45e-06	0.000112931	12.6667	48.3333
							TMEM35A	2.19823	5.48e-06	0.000113384	13.3333	44.6667
							FREM1	-2.017	5.62e-06	0.000115718	113.333	19.6667
							PLXDC1	2.50522	5.63e-06	0.000115794	47	192.667
							ENSOARG00000004806	-2.24031	5.98e-06	0.00012235	80.6667	12.6667
							ENSOARG00000019721	2.41749	6.16e-06	0.000125484	182.878	678.444
							ENSOARG00000014486	-2.05278	6.61e-06	0.000133636	1587.87	271.322
							ETV1	2.60494	6.72e-06	0.00013538	34.3333	146.667
							CYYR1	2.24399	6.75e-06	0.000135691	107	367.667
							CYP4B1	-2.54606	6.8e-06	0.000136766	929.68	118.333
							RBBP8NL	-2.10727	7e-06	0.00014004	264	43.6667
							GUCY1B3	2.04165	7.21e-06	0.000143816	249.667	726.333
							ENSOARG00000026856	2.33769	7.44e-06	0.000147797	11.3333	41.6868
							ABCB9	-2.04292	7.67e-06	0.000151844	428.333	74.3333
							RSU1	2.03997	7.71e-06	0.000152444	501.333	1455
							GDF11	2.40273	7.78e-06	0.000153659	22	87.6667
							RASSF4	2.55761	8.29e-06	0.000162438	94.6667	403.667
							FBN1	2.06681	8.34e-06	0.000163289	2051.67	6029.67
							CRYBG2	-2.27011	8.41e-06	0.00016431	2064.33	312
							ADAMTS15	2.43056	8.71e-06	0.000169853	48.6667	187.333
							TARSL2	-2.01599	8.75e-06	0.000170497	249.333	45.3333
							HOXA3	2.32824	8.89e-06	0.000172759	16.6667	61.6667
							ENSOARG00000006615	2.20121	9.09e-06	0.000176354	41.2022	137.147
							FN3K	2.49697	9.26e-06	0.000179398	14.6667	61.3333
							ENSOARG00000000606	2.20045	9.8e-06	0.000188005	285.667	1002.33
							RUNX1T1	2.28453	9.83e-06	0.000188555	79.6667	284
							PPM1H	-2.03316	9.85e-06	0.00018864	907	158.333
							MFAP4	2.18169	9.94e-06	0.000190234	1174.67	3974.67
							DACT1	2.25549	1.02e-05	0.000194105	117	405.333
							ENSOARG00000016231	-2.99679	1.04e-05	0.000198088	47264.7	4276
							KIAA1456	2.54115	1.06e-05	0.00020133	25.3333	106
							ENSOARG00000011815	3.1698	1.08e-05	0.000204743	84.6667	527
							SCMH1	2.2352	1.08e-05	0.000205373	95.3333	324
							MRAS	2.03043	1.08e-05	0.000205373	32.3333	95
							C6orf141	2.41998	1.14e-05	0.000214153	23.3333	89
							SNCA	2.08944	1.15e-05	0.000215767	16.3333	50
							PDE2A	2.07679	1.16e-05	0.000217035	250	774.667
							ENSOARG00000009541	-2.30136	1.19e-05	0.0002223	1272.09	211.33
							ENSOARG00000011181	2.04277	1.26e-05	0.000234106	58.3333	165.667
							IL36A	3.71845	1.38e-05	0.000252486	275.333	2647
							ENSOARG00000013353	2.07633	1.44e-05	0.00026351	16.6667	51.6667
							TMEM100	2.76665	1.53e-05	0.000277224	26	133.333
							CLDN7	-3.13206	1.75e-05	0.000313469	1325	109
							BNC2	2.09282	1.78e-05	0.000317097	45.3333	138.667
							LY6G6C	-2.05989	1.78e-05	0.000317759	160.065	26.9344
							ASTN2	2.06295	1.8e-05	0.000320083	79	246
							ENSOARG00000025634	2.06319	1.82e-05	0.000323627	14.7372	44.3608
							ENSOARG00000005737	-2.19605	2.03e-05	0.000354815	799.667	126.333
							ENSOARG00000008111	-2.14531	2.03e-05	0.000355674	536	87.3333
							FAM180B	2.80015	2.14e-05	0.000372731	12	62.3333
							CRISP3	-2.89332	2.15e-05	0.000374176	36286.7	3421.33
							RGS9	2.38056	2.17e-05	0.000375865	38.6667	147.333
							SVIL	2.25946	2.17e-05	0.000375865	1681.67	5836.67
							SULF1	2.12853	2.2e-05	0.000380453	115	362.333
							ABCG1	-2.00306	2.21e-05	0.000381148	737.667	133
							COL6A1	2.10169	2.23e-05	0.000384908	4836	15034.7
							LRRC75A	2.12917	2.43e-05	0.00041461	11.3333	36
							SLIT3	2.13694	2.47e-05	0.000419959	277.667	896.333
							SARDH	2.15053	2.51e-05	0.000425872	27.3333	89.6667
							ENSOARG00000025556	-2.09082	2.55e-05	0.000430616	7177.88	1235.6
							SAMD9	-2.24272	2.61e-05	0.000439196	2986.33	452
							ADCYAP1R1	2.1861	2.72e-05	0.000456034	27.6667	92
							ENSOARG00000025417	2.47648	2.76e-05	0.000461538	14	54
							CD177	-4.66617	2.77e-05	0.000462725	5870.65	169.933
							ENSOARG00000002529	2.22732	2.82e-05	0.000469685	41	140.333
							ENSOARG00000015755	2.27293	2.89e-05	0.000481694	75.3333	263.326
							MAP2	2.14918	2.9e-05	0.000483009	45.6667	147
							ENSOARG00000001554	2.29441	2.99e-05	0.000495834	206.333	719
							ITGA5	2.24269	3.17e-05	0.000520679	632	2175.67
							COL1A1	2.13721	3.31e-05	0.000542138	29268.7	92500.7
							PI16	4.09982	3.4e-05	0.000554747	95	1102.33
							PCOLCE2	3.63945	3.65e-05	0.000590908	89.6667	754.333
							SCD5	2.08807	3.65e-05	0.000590908	29	90.6667
							MFAP5	2.68613	3.74e-05	0.000602357	378.374	1659.99
							SLC35F1	2.20871	3.79e-05	0.000608726	14.6667	48.3333
							SHANK1	2.6034	3.83e-05	0.000614546	13.0068	59.7815
							ENSOARG00000001587	2.29412	3.88e-05	0.000620144	43.6667	155.333
							ENSOARG00000000507	2.62764	3.9e-05	0.000622568	35.3703	153.356
							ENSOARG00000016186	-2.11017	3.93e-05	0.000626557	2300.33	382
							LPL	2.80804	3.97e-05	0.000631314	40	195.333
							CCDC187	2.03854	4.27e-05	0.000671838	35	106.667
							CHRNB3	2.23875	4.35e-05	0.000683533	74.3298	213.115
							ENSOARG00000018603	2.0445	4.36e-05	0.000685738	115.333	365.667
							MEI1	2.49832	4.43e-05	0.000695487	27	109.333
							PRKG1	2.35593	4.82e-05	0.000748655	32	115
							ENSOARG00000005973	-2.24753	4.91e-05	0.000762003	322.667	48.6667
							SLIT2	2.35294	5.02e-05	0.000777138	97	341
							SLC5A9	-2.30611	5.14e-05	0.000792997	303	44.3333
							ENSOARG00000026749	2.52843	5.18e-05	0.000798534	10.6001	44.4304
							HOXB2	2.43901	5.18e-05	0.000798534	20.6667	83
							APOA1	-2.06709	5.2e-05	0.000801318	287.333	48.6667
							TGM2	2.65313	5.24e-05	0.000806452	450	2083.33
							SMOC1	3.71671	5.42e-05	0.000830211	11.6667	106.333
							ENSOARG00000009717	2.3629	5.41e-05	0.000830211	18.5916	66.9971
							PDGFRL	2.29188	5.52e-05	0.000842708	96.1204	330.698
							GJB6	-3.35655	5.6e-05	0.000851446	2984	207
							TMPRSS11E	-2.18695	5.63e-05	0.000855657	3226.33	512
							ENSOARG00000012665	2.59123	5.7e-05	0.000864377	16	69.3333
							DPP4	-2.3134	5.75e-05	0.000869875	200	29
							NID2	2.27846	6.01e-05	0.000905475	943.333	3248.67
							MALL	-2.29176	6.2e-05	0.000929702	1708.33	252.667
							CA3	-2.31769	6.42e-05	0.000958133	800.333	110.667
							MMP23B	2.20025	6.63e-05	0.000984237	102.492	342.932
							PDE7B	2.20748	6.67e-05	0.000988485	31.6667	104
							TCN1	-3.19512	6.81e-05	0.00100756	3029	243
							ENSOARG00000016748	-2.12498	6.85e-05	0.00101206	90.3257	15.3333
							ALDH1L2	2.0264	6.93e-05	0.00101954	158.667	452
							ENSOARG00000002396	-2.20653	7.04e-05	0.00103155	283.858	43.015
							ENSOARG00000016175	2.14667	7.25e-05	0.00106092	148.233	466.173
							ENSOARG00000026457	2.20773	7.33e-05	0.00107039	180.06	582.357
							COL1A2	2.11163	7.34e-05	0.00107095	25919.3	80206
							FAM221B	2.15718	7.78e-05	0.00112526	63.6667	202.333
							ENSOARG00000002231	-3.54727	7.78e-05	0.00112526	2976.33	183.667
							SCNN1A	-2.54237	7.84e-05	0.00113272	3825.67	472.333
							ENSOARG00000025492	2.04825	7.95e-05	0.00114596	20.6667	62.0164
							ENSOARG00000009849	2.09586	8.67e-05	0.00124275	97.8343	291.953
							RGS6	2.79042	9.35e-05	0.00132772	12.3333	61
							C1QTNF2	2.12244	9.54e-05	0.00134848	60.6667	192.333
							CARTPT	2.30562	9.7e-05	0.00136844	47	160.667
							CHRDL1	2.10113	9.93e-05	0.00139638	117.667	366
							NINJ2	2.7132	0.0001057	0.00147174	19.6667	94
							HOXB9	2.47802	0.000113007	0.00155587	15.6667	63
							ACTA2	2.58723	0.000113392	0.00156038	4111	17094.3
							NCAM1	2.32337	0.000113861	0.00156603	181	660
							ENSOARG00000006669	3.56078	0.000115521	0.00158324	274.756	2287.76
							CRISPLD2	2.11222	0.00011746	0.00160737	123.667	385.333
							ENSOARG00000013207	2.20724	0.00012489	0.00169751	200.568	653.548
							KLHDC8A	-2.25691	0.000132122	0.00177832	458.333	68.6667
							ENSOARG00000019958	2.00792	0.00013322	0.00179133	79	235
							CHRNA3	2.6216	0.000135437	0.00181751	18.3333	81
							SLC45A3	-2.46355	0.0001411	0.00188324	155	20
							CA4	2.63391	0.000145694	0.00193691	13.2131	57.4438
							TMEM255A	2.00527	0.000148908	0.00196597	13	38
							GJB5	-2.31729	0.000155029	0.00203205	104	15
							ENSOARG00000017002	3.08678	0.000156112	0.00204426	23705.5	144081
							ADAMTS8	2.3642	0.000160629	0.00209632	40.6667	150.333
							CCDC80	2.48557	0.000162287	0.00211387	790	3084.33
							NR4A1	2.67221	0.000164189	0.00213556	56.3333	264.333
							SNTA1	2.44958	0.000182282	0.00233277	26.6667	106.333
							ENSOARG00000000143	2.61171	0.000187597	0.00238723	162.256	697.666
							RYR1	-2.0083	0.000203121	0.00255084	64.6667	11.6667
							MAP3K7CL	3.23416	0.000213988	0.00266049	11.3333	77.6665
							PTPRD	2.33478	0.000217036	0.00269096	13.6667	49.3333
							ENSOARG00000025170	-2.09696	0.000230435	0.00283278	1325.16	219.966
							TMTC1	2.03783	0.000233228	0.00285898	72.3333	213
							DMKN	-3.22375	0.00024567	0.00299385	3728	282.333
							ENSOARG00000002813	2.12763	0.000253422	0.00307724	42.3333	143
							SCNN1D	-2.26011	0.000253619	0.00307825	121.333	18.3333
							ARHGAP20	2.18397	0.000269467	0.00324296	12	40
							PIK3C2G	-2.22405	0.000305202	0.00360102	658	101
							SLC39A8	-3.40543	0.000310146	0.00364654	1645	112.333
							FOXE1	-2.10003	0.000315371	0.00370154	471.333	79
							IL36G	3.91544	0.00035049	0.00406262	28	303.667
							ENSOARG00000000730	2.44967	0.000358069	0.00413452	15.5257	58.9129
							CRISPLD1	-2.00127	0.000366793	0.00421368	298.667	54
							ISLR	2.15418	0.000371845	0.00426087	133	408.333
							PLAUR	-2.22327	0.000395331	0.0044976	1502.33	237.333
							ENSOARG00000002708	-2.23506	0.000421554	0.00474354	114.319	17
							LOXL4	2.3764	0.000426944	0.00479873	155	570.333
							HERC6	-3.86438	0.000439949	0.00491516	318.955	15.7396
							ENO3	2.1177	0.000488873	0.00537205	20.3333	63
							ENSOARG00000000825	-2.08778	0.000526512	0.00570912	109.401	18
							GRIK3	2.406	0.000545069	0.00587502	15.6667	59.3333
							ENSOARG00000002722	2.51459	0.000554776	0.00596065	99.4937	410.664
							ENSOARG00000000573	2.27197	0.000557965	0.00599254	13	44
							BFSP1	2.00668	0.000602819	0.00638804	37.6667	110.333
							KPRP	-3.60173	0.000634122	0.00666597	726.266	44.3742
							TRPC4	3.64954	0.000641504	0.00672424	34.3333	305.333
							SMPDL3A	2.02917	0.000688081	0.00710239	29.6667	90.3333
							CPZ	2.27252	0.00070839	0.00729254	47.3333	158.333
							CNFN	-3.65294	0.000765852	0.00777462	15879.7	941.667
							KRT16	3.88389	0.000898145	0.00892012	222.397	2180.3
							ENSOARG00000009537	-2.61776	0.0009185	0.00909224	264	31.6667
							RASL10B	2.09252	0.000971749	0.00957382	67.6487	197.9
							ENSOARG00000009805	2.5043	0.00103286	0.0100551	56.62	224.676
							ENSOARG00000026956	2.241	0.00107168	0.0103992	380.389	1246.37
							FGF13	2.14097	0.00110354	0.0106512	10.3333	29.3333
							ENSOARG00000007979	-2.20978	0.00112001	0.0107793	89.3333	13.6667
							ENSOARG00000025549	2.1718	0.00121532	0.0115245	26.0042	86.5146
							MYOM3	2.60469	0.00143909	0.0132426	12.3333	55.6667
							KRT14	3.03339	0.00145351	0.013348	2323.81	13516.8
							ENSOARG00000009211	2.48381	0.00146899	0.0134627	13.5463	53.3017
							ENSOARG00000001878	2.14449	0.00147317	0.0134919	295.913	927.383
							DUSP4	-2.00081	0.00148032	0.0135528	107	19.6667
							ENSOARG00000012585	-2.25896	0.00150152	0.0137191	138	21
							KIAA1755	2.04905	0.00153374	0.0139569	41	122
							NCCRP1	-3.68673	0.00154867	0.0140738	3796.68	217.302
							C4BPA	-2.62837	0.00158493	0.0143312	130.571	25.3604
							BMPER	2.26391	0.00190359	0.0168575	28	97.3333
							KRT20	-2.8375	0.00196636	0.0173453	136	13.6667
							LVRN	2.78622	0.00207457	0.0181459	20.6667	97
							ENSOARG00000002875	-2.27903	0.00220193	0.0191029	1020.28	155.829
							SHCBP1L	2.37309	0.00228883	0.0197016	15.3333	56.6667
							ENSOARG00000002143	-2.13324	0.00247061	0.020953	124.277	21.3792
							ENSOARG00000004994	-4.03527	0.00256895	0.021631	301.667	13
							GFRA1	2.36624	0.00261509	0.021969	23.3313	82.345
							ENSOARG00000008501	-2.51122	0.00270319	0.0225299	1109.66	144.667
							ENSOARG00000025195	5.62044	0.0028396	0.0234716	198.162	6919.23
							ENSOARG00000025555	2.82024	0.00289341	0.0237884	8535.75	42851.2
							ENSOARG00000015892	2.00405	0.00295324	0.0241892	473.128	1342.05
							ENSOARG00000002958	-2.06625	0.00308245	0.0250508	644.747	107.614
							RBBP4	-2.38393	0.00325975	0.0262299	2647.94	367.773
							SLC28A3	-2.43093	0.00331191	0.0265798	1543.33	205.333
							KLK13	-3.89852	0.00333483	0.0267162	5323.33	250
							ENSOARG00000008056	-2.22588	0.00338429	0.0270563	4528	703
							MX2	-2.77249	0.00432598	0.0326094	442.667	47.3333
							CD207	2.35967	0.00443712	0.0332526	18	68.3333
							KLK14	-4.65131	0.0044704	0.0334742	1567.33	43.6667
							SLC26A9	-2.59995	0.00457802	0.0341289	2237	270.333
							ENSOARG00000015853	2.05211	0.00603503	0.0426631	22.4852	63.533
							ENSOARG00000007427	-2.22299	0.00639937	0.0447693	91	14.3333
